1                   **Profiling the effect of micronutrient levels on vital cardiac markers**

2                   Hari Krishnan Krishnamurthy<sup>1\*</sup>, Swarnkumar Reddy<sup>2</sup>, Vasanth Jayaraman<sup>1</sup>, Karthik  
3                   Krishna<sup>1</sup>, Qi Song<sup>2</sup>, Tianhao Wang<sup>1</sup>, Kang Bei<sup>1</sup>, John J. Rajasekaran<sup>1</sup>

4                   1 Vibrant Sciences LLC., San Carlos, CA, United States of America, 2 Vibrant America  
5                   LLC., San Carlos, CA, United States of America

6                   Short title: Micronutrients and cardio markers

7                   Corres: \* hari@vibrantsci.com (HKK)

8

9                   Corresponding Author:

10                  Hari Krishnan Krishnamurthy

11                  Director – Biomedical Engineering

12                  Vibrant Sciences LLC

13                  1021 Howard Avenue

14                  San Carlos, CA 94070

15                  Ph: 5094325707

16

17

18

19

20

21

22                  Number of Tables: 03

23                  Number of Figures: 02

24                  Word count: 3815

25

26

27

28

29

30                  NOTE: This preprint reports new research that has not been certified by peer review and should not be used to guide clinical practice.

31 **Abstract**

32 Cardiovascular diseases (CVD) are among the most preventable chronic disorders accounting  
33 for about one-third of general mortality around the globe. Micronutrients have been shown to  
34 have a significant impact on cardiovascular health. Micronutrients have been looked at as the  
35 most adoptable lifestyle choice which could reduce the burden of disease around the world. In  
36 this context, it is important to study the levels of micronutrients and see their correlation to  
37 cardiac disease biomarkers. The present study, has attempted to investigate the relationship  
38 between the diverse class of micronutrients and serum levels of the key lipids and lipoproteins.  
39 A retrospective analysis was carried out between the serum levels of micronutrients and vital  
40 cardiovascular markers. The study was carried out in a group of 358 individuals tested for the  
41 Cardio Health and Micronutrients Panel at Vibrant America Clinical Laboratory. The study  
42 population was categorized based on the serum concentration of lipids and lipoproteins into 3  
43 groups ‘Low’ ‘Normal’ and ‘High’ and the levels of micronutrients were compared among  
44 these groups. The results revealed a significant association of several cardiovascular markers  
45 with vitamins including Vit D, Vit E, Vit K, and minerals including zinc, iron, calcium,  
46 magnesium, and amino acids including leucine, isoleucine, and valine. Quantitative analysis  
47 by Pearson’s correlation exhibited a negative correlation of asparagine with serum levels of  
48 cholesterol and LDL. Amino acids such as cysteine, isoleucine, and valine were found to have  
49 a significant negative correlation with HDL. A positive correlation was observed between  
50 valine and serum levels of LDL and Apo B. Vitamins such as Vit A, Vit D3, Vit E, and Vit K1  
51 were found to have a strong positive correlation with levels of total cholesterol and  
52 triglycerides. The study summarizes micronutrients and modulation of several lipid markers  
53 which are critical for the management of cardiovascular diseases. Micronutrients such as  
54 vitamins B1, B3, asparagine, and glutamine have a strong positive association, and fat-soluble  
55 vitamins, and BCAA has a strong negative association with cardiovascular health.

56

57 Keywords: micronutrients, cardiovascular diseases, amino acids, lipids, vitamins, branched-  
58 chain amino acids

59

60

61

## 62 **Introduction**

63 Micronutrients are the most essential nutrients for a whole range of physiological functioning  
64 of a living system. Dietary deficiency of micronutrients leads to pathogenesis, progression, and  
65 morbidity in various critical clinical disorders including cardiovascular diseases (CVD) [1].  
66 The pathobiology of CVD remains complex and it is generally regarded to be a result of various  
67 genetic predispositions interacting with environmental factors. More than 40% of the CVD are  
68 related to nutritional factors and more than 90% of such cases were attributed to preventable  
69 factors with nutrition as a major determinant [2]. Atherosclerosis and hypertension are the  
70 predominant chronic cardiovascular diseases that are profoundly preventable with a multi-  
71 component strategy including nutrient, diet, and lifestyle interventions [1]. Atherosclerosis,  
72 characterized by the chronic inflammation of arteries affecting the function of the heart results  
73 from the deposition of fats, cholesterol, and other substances on the inner lining of the artery  
74 eventually resulting in cardiovascular disease or heart failure [3]. It is estimated that  $\geq 2\%$  of  
75 the adult population has atherosclerosis which tends to increase up to 10% or higher in people  
76 above 70 years and continues to increase with the age of the population [4]. Hypertension is  
77 another predominant CVD, which is clinically referred to as a chronic sustained increase in  
78 arterial blood pressure. Hypertension is the most widespread CVD with more than 35% of the  
79 population affected globally, A report from the World health organization stated this might  
80 increase beyond 50% in 2025 [3]. Cardiac disease, being a complex multifunctional etiology,  
81 the precise mechanism of pathophysiology remains unclear in both atherosclerosis and  
82 hypertension. Atherosclerosis is characterized by the impaired flow of blood and hypertension  
83 is characterized by a chronic increase in blood pressure, both these conditions result in  
84 abnormal cardiac functioning and vascular damage [5].

85 Cardiovascular diseases include a wide spectrum of risk factors such as genetic, behavioral,  
86 and environmental factors. In most cases CVDs commonly result from the interplay of multiple  
87 risk factors, common classical risk factors include age, any pre-existing medical illness such  
88 as diabetes, hypertension, predisposition genetics, or behavioral factors like smoking. Among  
89 these risk factors, environmental factors are the most easily modifiable and play a pivotal role  
90 in cardiovascular health. The environmental factors are the least investigated risk factors and  
91 are noted as the most preventable risk factors of CVDs. Environmental factors include the  
92 intake of micronutrients such as vitamins, minerals, and amino acids. The micronutrients  
93 include organic compounds such as Vit A, Vit C, Vit D, Vit E, and Vit K, dietary minerals  
94 including calcium, sodium, potassium, magnesium, etc, and trace elements like iron,

95 chromium, copper, selenium, and zinc [6, 7, 8, 9]. Several clinical reports have shown a  
96 significant correlation between the deficiency of one or more micronutrients and cardiovascular  
97 diseases. However, those reports were limited by the diversity of the micronutrients studied.  
98 For instance, Rai et al. [10] evaluated the effect of two micronutrients copper and zinc on lipid  
99 profiles in healthy adults, and another study by Islam et al. [6] reported that no significant  
100 impact was observed by consumption of vitamin D with calcium on serum lipids. The current  
101 study aimed to broadly investigate the correlation between cardiovascular markers and the  
102 levels of 32 micronutrients. We also attempted to hypothesize the pathophysiology of  
103 micronutrient deficiency through which the cardio biomarkers could be affected.

## 104 **Material and methods**

### 105 Study population

106 A total of 358 candidates with a mean age of  $48 \pm 15$  years who were tested for cardiovascular  
107 panel and micronutrient panel between December 2020 and July 2021 at Vibrant America  
108 Clinical Laboratory were included in the study. The study was categorized as a retrospective  
109 analysis of observed clinical data and hence was exempted from formal ethical review by  
110 Western IRB (work order #1-1098539-1) (Washington USA). The study was conducted in a  
111 free-living general population with no clinical indications of abnormalities. The subjects were  
112 classified based on the serum levels of lipids and lipoproteins as detailed in Table 1.

### 113 Cardiovascular Panel

114 Blood samples were processed for the separation of serum and further analyzed for a  
115 cardiovascular panel comprised of lipids (total cholesterol, LDL, HDL, and triglycerides),  
116 apolipoproteins (Apo A1, Apo B), and a lipoprotein marker lipoprotein (a). Total cholesterol  
117 was measured by the cholesterol dehydrogenase method via the Beckman Coulter AU680  
118 analyzer. Serum levels of LDL, HDL, and triglycerides were measured by an enzymatic-  
119 colorimetric method using the Beckman Coulter AU680 analyzer. Other cardiovascular  
120 markers such as Apo A1, Apo B, and Lp (a) were also measured by a particle-enhanced  
121 immunoturbidimetric assay via Roche Cobas 6000 c 501 analyzers

### 122 Micronutrient Panel

123 Serum levels of micronutrients were determined using Waters TQ-XS Tandem mass  
124 spectrometer coupled with LCMS, Waters GC-MS, and Perkin Elmer NexION ICP-MS using  
125 standard protocols.

126 Statistical Analysis

127 Clinical data were subjected to retrospective analysis from de-identified subjects using Java for  
 128 windows version 1.8.161. Non-parametric Mann-Whitney U test was used to compare the  
 129 micronutrients with normal and altered lipid and lipoprotein concentrations. Pearson's  
 130 correlation was carried out to analyze the univariant relationship between serum lipids,  
 131 lipoproteins, and micronutrients with significance set at  $p < 0.05$ . All statistical analysis was  
 132 performed using GraphPad Prism Version 7.00 and a descriptive statistic was used to define  
 133 the continuous variables (mean  $\pm$  SD, median, minimum and maximum).

134 **Results**

135 The study group comprised 165 males and 193 females with a mean age group of  $47.9 \pm 15.4$ ,  
 136 table 1 shows the descriptive statistics of the lipid and lipoprotein profile of 358 subjects. The  
 137 study aimed to evaluate the significant relationship of the wide range of micronutrients  
 138 including vitamins, dietary minerals, trace elements, and organic compounds with cholesterol  
 139 (total, LDL, HDL), triglycerides as well as apo A, apo B, and Lp (a) levels.

140 Table 1: Serum Lipid, and Lipoprotein levels of candidates

| <b>Cardio marker</b> | <b>n=358</b> | <b>Frequency<br/>(n)</b> | <b>Mean <math>\pm</math> SD</b> |
|----------------------|--------------|--------------------------|---------------------------------|
|                      | Male         | 165                      | $48.1 \pm 16.6$                 |
|                      | Female       | 193                      | $47.8 \pm 14.4$                 |
| <b>Cholesterol</b>   | Low          | -                        | -                               |
| $\leq 199$ mg/dL     | Normal       | 296                      | $183.3 \pm 29.9$                |
|                      | High         | 62                       | $265.5 \pm 26.6$                |
| <b>Low-density</b>   | Low          | -                        | -                               |
| <b>lipoprotein</b>   | Normal       | 212                      | $98.3 \pm 21.1$                 |
| $\leq 99$ mg/dL      | High         | 146                      | $163.8 \pm 27.7$                |
| <b>High-density</b>  | Low          | 36                       | $35.1 \pm 5.4$                  |
| <b>lipoprotein</b>   | Normal       | 301                      | $59.5 \pm 15.6$                 |
| $\geq 56$ mg/dL      | High         | 2                        | -                               |
| <b>Triglyceride</b>  | Low          | -                        | -                               |
| $\leq 149$ mg/dL     | Normal       | 323                      | $87.6 \pm 36.0$                 |
|                      | High         | 35                       | $314.2 \pm 168.4$               |

|                          |        |     |              |
|--------------------------|--------|-----|--------------|
| <b>Apolipoprotein A1</b> | Low    | 47  | 116.8 ± 17.0 |
|                          | Normal | 311 | 169.0 ± 30.4 |
| ≥120 mg/dL               | High   | 2   | -            |
| <b>Apolipoprotein B</b>  | Low    | -   | -            |
|                          | Normal | 270 | 88.9 ± 18.0  |
| ≤89 mg/dL                | High   | 88  | 144.0 ± 30.8 |
| <b>Lipoprotein (a)</b>   | Low    | -   | -            |
| ≥30 mg/dL                | Normal | 157 | 14.1 ± 6.4   |
|                          | High   | 84  | 69.4 ± 34.9  |

141

142 The subjects were classified based on the levels of serum lipids and lipoproteins. In the case of  
 143 total cholesterol (TC), LDL, triglycerides, and Apo B the subjects were categorized based on  
 144 lipid concentrations higher than the reference range and subjects within the reference range  
 145 while in the case of HDL and apo A the subjects were divided into lipid concentrations lower  
 146 than the reference range and subjects within the reference range. A significant statistical  
 147 relationship was observed between various micronutrients and serum lipid and lipoprotein  
 148 concentrations as shown in table 2. An increase in the serum levels of Vit E, Vit D3, and Mg  
 149 were found to be statistically significant with increased levels of serum cholesterol and LDL.  
 150 A decrease in serum levels of HDL was significantly affected by the serum levels of Vit D  
 151 25(OH), asparagine, glutamine, and serine. A high level of serum triglycerides is significantly  
 152 associated with increased levels of various micronutrients including Vit A, Vit D 25(OH), Vit  
 153 E, Vit K1, and amino acids such as glutamine, serine, isoleucine, valine, and leucine.

154

155 Table 2: Significant association of micronutrients with serum lipids and lipoprotein

| <b>CHOLESTEROL</b> |                        |                 |                      |                 |                   |
|--------------------|------------------------|-----------------|----------------------|-----------------|-------------------|
|                    | Greater than Reference |                 | Within range (n=296) |                 | P                 |
|                    | Range (n=62)           |                 |                      |                 | ( <i>p</i> <0.05) |
| Vitamin E          | 16±5.7                 | 14.4 (7.9-29.4) | 12.9±4.2             | 11.9 (5.3-30.7) | 0.0001            |
| Vitamin D3         | 1.1±0.2                | 1.1 (0.4-1.7)   | 0.8±0.2              | 0.8 (0.3-1.6)   | 0.0001            |
| Vitamin K1         | 2.1±1.5                | 1.5 (0.1-7.3)   | 1.4±1.3              | 1.2 (0.05-13.9) | 0.0003            |
| Calcium            | 9.8±0.3                | 9.8(9-10.6)     | 9.6±0.4              | 9.6 (8.5-11.2)  | 0.0001            |

|                                 |                                         |                    |                      |                    |                        |
|---------------------------------|-----------------------------------------|--------------------|----------------------|--------------------|------------------------|
| Magnesium                       | 2.2±0.1                                 | 2.2 (1.9-2.6)      | 2.1±0.1              | 2.1 (1.0-2.6)      | 0.0001                 |
| <b>LOW-DENSITY LIPOPROTEIN</b>  |                                         |                    |                      |                    |                        |
|                                 | Greater than Reference<br>Range (n=146) |                    | Within range (n=212) |                    | P<br>( <i>p</i> <0.05) |
| Vitamin E                       | 14.8±4.8                                | 13.6(7.3-29.4)     | 12.3±4.2             | 11.2(5.3-30.7)     | 0.0001                 |
| Vitamin D3                      | 1.04±0.26                               | 1.02(0.44-1.78)    | 0.84±0.81            | 0.81(0.32-1.63)    | 0.0001                 |
| Iron                            | 108±33.3                                | 108.1(35.5-201.8)  | 99.1±41.4            | 91.4(25.3-238.9)   | 0.0024                 |
| Magnesium                       | 2.23±0.16                               | 2.2(1.5-2.66)      | 2.16±0.19            | 2.1(1.0-2.6)       | 0.0002                 |
| <b>HIGH-DENSITY LIPOPROTEIN</b> |                                         |                    |                      |                    |                        |
|                                 | Less than Reference<br>Range (n=36)     |                    | Within range (n=301) |                    | P<br>( <i>p</i> <0.05) |
| Vitamin D 25 OH                 | 40.7±24.9                               | 33.6(12.4-136)     | 48.3±22.8            | 41.7(8.8-133)      | 0.0091                 |
| Asparagine                      | 105.6±42.6                              | 110.1(34.1-220.6)  | 53.9±11.6            | 52.9(28.1-108.0)   | 0.0001                 |
| Glutamine                       | 212.5±164.3                             | 124.6(61.0-671.4)  | 508.6±80.7           | 510.9(202.2-752.4) | 0.0001                 |
| Serine                          | 128.0±36.2                              | 124.7(61.0-282.9)  | 149.4±34.2           | 145.6(59.6-274.5)  | 0.0001                 |
| <b>TRIGLYCERIDES</b>            |                                         |                    |                      |                    |                        |
|                                 | Greater than Reference<br>Range (n=36)  |                    | Within range (n=323) |                    | P<br>( <i>p</i> <0.05) |
| Vitamin E                       | 20.1±17                                 | 16.7(8.5-118.7)    | 12.9±4.3             | 11.9(5.3-29.4)     | 0.0001                 |
| Vitamin A                       | 88.4±27.3                               | 82(52.8-151.9)     | 75.8±23.3            | 72.1(34.1-151.5)   | 0.0061                 |
| Vitamin K1                      | 3.14±2.7                                | 2.3(0.22-13.9)     | 1.42±0.99            | 1.22(0.05-7.32)    | 0.0001                 |
| Vitamin D25 OH                  | 33.9±13.6                               | 30.7(15.4-71.2)    | 48.6±23.2            | 41.8(8.8-136)      | 0.0001                 |
| Glutamine                       | 463.7±107.6                             | 472.9(118.7-608.3) | 508.4±78.7           | 507.6(202.2-752)   | 0.0290                 |
| Serine                          | 136.5±32.8                              | 130.6(76.0-198.5)  | 149.6±34.7           | 145.6(59.6-282.9)  | 0.0368                 |
| Carnitine                       | 32.6±16.5                               | 31.5(11.6-118.7)   | 26.5±7.2             | 26.6(4.1-50.5)     | 0.0014                 |
| Isoleucine                      | 84.0±27.5                               | 84.2(35.7-142.7)   | 67.1±19.1            | 64.6(24.0-139.7)   | 0.0002                 |
| Valine                          | 275.0±63.3                              | 281.1(175.3-442.4) | 241.7±52.8           | 233.6(134.9-442.7) | 0.0020                 |
| Leucine                         | 179.9±36.8                              | 182.7(113.7-233.5) | 161.7±34.1           | 157.4(79.7-249.2)  | 0.0033                 |
| <b>APOLIPOPROTEIN A</b>         |                                         |                    |                      |                    |                        |
|                                 | Less than Reference<br>Range (n=47)     |                    | Within range (n=323) |                    | P<br>( <i>p</i> <0.05) |

|            |           |                  |            |                   |        |
|------------|-----------|------------------|------------|-------------------|--------|
| Vitamin E  | 12.2±4.8  | 10.9(4.0-23.4)   | 13.5±4.7   | 12.4(5.6-30.7)    | 0.0369 |
| Vitamin D3 | 0.84±0.24 | 0.81(0.41-1.5)   | 0.94±0.28  | 0.91(0.32-2.19)   | 0.0198 |
| Asparagine | 51.0±10.6 | 49.4(34.1-79.1)  | 54.5±12.1  | 53.3(28.1-113.0)  | 0.0444 |
| Calcium    | 9.4±0.3   | 9.5(8.7-10.4)    | 9.6±0.39   | 9.6(8.5-11.1)     | 0.0022 |
| Zinc       | 0.69±0.19 | 0.64(0.45-1.50)  | 0.71±0.15  | 0.69(0.39-2.23)   | 0.0315 |
| Iron       | 85.6±36.6 | 78.5(25.3-182.4) | 105.5±38.4 | 101.6(33.2-238.9) | 0.0015 |

### APOLIPOPROTEIN B

|            | Greater than Reference<br>Range (n=87) | Within range (n=270) | P<br>( <i>p</i> <0.05) |                   |        |
|------------|----------------------------------------|----------------------|------------------------|-------------------|--------|
| Vitamin E  | 16.0±5.5                               | 15.3(7.3-29.0)       | 12.5±4.1               | 11.7(4.0-30.7)    | 0.0001 |
| Vitamin A  | 82.4±23.7                              | 77.7(34.1-145.8)     | 75.8±24.2              | 72.1(37.1-151.9)  | 0.0096 |
| Vitamin D3 | 0.87±0.24                              | 0.83(0.32-1.6)       | 1.09±0.30              | 1.08(0.44-2.19)   | 0.0001 |
| Vitamin K1 | 1.5±1.3                                | 1.2(0.05-13.9)       | 1.8±1.4                | 1.4(0.10-7.3)     | 0.0416 |
| Selenium   | 146.4±24.0                             | 144.8(93.4-210.8)    | 142.3±30.3             | 139(95.7-360.4)   | 0.0451 |
| Potassium  | 4.5±0.35                               | 4.5(3.6-5.6)         | 4.5±0.40               | 4.49(3.1-6.22)    | 0.0377 |
| Calcium    | 9.7±0.3                                | 9.7(8.7-10.6)        | 9.6±0.3                | 9.6(8.5-11.1)     | 0.0055 |
| Zinc       | 0.73±0.11                              | 0.72(0.39-1.0)       | 0.70±0.17              | 0.68(0.44-2.23)   | 0.0058 |
| Iron       | 109.3±34.2                             | 107.7(45.6-201.3)    | 100.8±39.9             | 97.7(25.3-238.9)  | 0.0239 |
| Magnesium  | 2.2±0.1                                | 2.2(1.9-2.9)         | 2.1±0.19               | 2.1(1.0-2.6)      | 0.0002 |
| Isoleucine | 72.7±19.9                              | 70.7(34.0-121.4)     | 67.6±20.7              | 64.2(24.0-142.7)  | 0.0138 |
| Valine     | 261.9±55.2                             | 262.7(146.5-404.0)   | 240.2±54.2             | 232.1(134.9)      | 0.0004 |
| Leucine    | 172±34.8                               | 168.8(113.7-248.2)   | 160.5±34.2             | 157.4(79.7-249.2) | 0.0138 |
| Serine     | 140.6±33.0                             | 135.4(75.0-209.7)    | 151.1±34.7             | 147.2(59.6-282.9) | 0.0189 |

156

157 Decreased levels of serum Apo A are significantly associated with decreased serum levels of  
 158 Vit E, Vit D3, asparagine, and minerals such as calcium, zinc, and iron. The elevated levels of  
 159 Apo B associated with increasing the serum LDL and non-HDL fats are found to be statistically  
 160 significant with all classes of micronutrients including vitamins, minerals, amino acids, and  
 161 trace elements.

162 Quantitative analysis by Pearson's correlation showed serum concentration of cholesterol had  
 163 a strong positive correlation with serum levels of Vit E ( $r=0.4086$ ,  $p<0.0001$ ), Vit D3  
 164 ( $r=0.5125$ ,  $p<0.001$ ), and Vit K1 ( $r=0.2334$ ,  $p<0.0001$ ) The cholesterol levels are also



165 considerably correlated with Vit A and iron ( $<0.05$ ). The serum levels of cholesterol were  
166 found to have a significantly negative correlation with folate and asparagine. LDL was found  
167 to have a significant positive correlation with serum levels of Vit E ( $r=0.3398$ ,  $p<0.0001$ ) and  
168 Vit D3 ( $r=0.4774$ ,  $p<0.0001$ ).

169 Pearson's correlation was carried out to analyze the univariant relationship between serum  
170 lipids, lipoproteins, and micronutrients with significance set at  $p<0.05$ . Significant results are  
171 shown in Table 3. The directionality of the variation of micronutrients is represented in Fig 2.  
172 It was interesting to note the significant association of branched-chain amino acids with several  
173 markers in the cardiovascular panel. Increased levels of BCAA (branched-chain amino acids)  
174 Leucine, Isoleucine, and Valine showed significant association with decreased levels of HDL  
175 and increased levels of triglycerides Fig 1. Increased levels of Valine were shown to have a  
176 significant association with increased levels of LDL and Apo B. These associations show the  
177 significant association between branched-chain amino acids and lipid dysregulation.  
178 Additionally, amino acids asparagine and glutamine were found to be inversely correlated with  
179 serum LDL. A significant inverse correlation was observed between glutamine and serine with  
180 serum levels of Apo B.

181 Figure 1. Correlation between serum triglycerides with serum BCAA

182 a. Leucine, b. Isoleucine, c. Valine

183 Table 3: Pearson correlation between micronutrients with serum lipids and lipoproteins

|                                | <b>r</b> | <b>p</b>          |
|--------------------------------|----------|-------------------|
| <b>CHOLESTEROL</b>             |          |                   |
| Vitamin E                      | 0.4086   | <i>&lt;0.0001</i> |
| Vitamin A                      | 0.1471   | <i>0.0053</i>     |
| Vitamin D3                     | 0.5125   | <i>&lt;0.0001</i> |
| Vitamin K1                     | 0.2334   | <i>&lt;0.0001</i> |
| Vitamin B9                     | -0.104   | <i>0.0493</i>     |
| Iron                           | 0.1067   | <i>0.0437</i>     |
| Asparagine                     | -0.125   | <i>0.018</i>      |
| <b>LOW-DENSITY LIPOPROTEIN</b> |          |                   |
| Vitamin D3                     | 0.4774   | <i>&lt;0.0001</i> |
| Iron                           | 0.1199   | <i>0.0233</i>     |

|                                 |         |                 |
|---------------------------------|---------|-----------------|
| Asparagine                      | -0.1217 | <i>0.0213</i>   |
| Glutamine                       | -0.1074 | <i>0.0423</i>   |
| Carnitine                       | 0.1446  | <i>0.0061</i>   |
| Valine                          | 0.1471  | <i>0.0053</i>   |
| <b>HIGH-DENSITY LIPOPROTEIN</b> |         |                 |
| Cysteine                        | -0.2289 | < <i>0.0001</i> |
| Isoleucine                      | -0.2298 | < <i>0.0001</i> |
| Valine                          | -0.2317 | < <i>0.0001</i> |
| Leucine                         | -0.2405 | < <i>0.0001</i> |
| <b>TRIGLYCERIDES</b>            |         |                 |
| Vitamin E                       | 0.3832  | < <i>0.0001</i> |
| Vitamin A                       | 0.2278  | < <i>0.0001</i> |
| Vitamin B6                      | -0.1057 | <i>0.0457</i>   |
| Vitamin D3                      | 0.1342  | <i>0.011</i>    |
| Vitamin K1                      | 0.5732  | < <i>0.0001</i> |
| Cysteine                        | 0.1626  | <i>0.002</i>    |
| Isoleucine                      | 0.2838  | < <i>0.0001</i> |
| Valine                          | 0.2234  | < <i>0.0001</i> |
| Leucine                         | 0.2139  | < <i>0.0001</i> |
| Arginine                        | 0.1363  | <i>0.0098</i>   |
| <b>APOLIPOPROTEIN B</b>         |         |                 |
| Glutamine                       | -0.1388 | <i>0.0086</i>   |
| Serine                          | -0.1269 | <i>0.0165</i>   |
| Valine                          | 0.1259  | <i>0.0173</i>   |
| <b>LIPOPROTEIN (a)</b>          |         |                 |
| Vitamin B1                      | -0.1818 | <i>0.0046</i>   |

184

185

Figure 2. Role of micronutrients in regulating serum lipids

186

Micronutrients in green font reduce the risk by modulating the particular component of the lipid

187

panel, Micronutrients in red font increase the risk by modulating the particular component of the lipid

188

panel

189

190 **Discussion**

191 Micronutrient deficiency is a major cause of the pathogenesis, progression, mortality, and  
192 morbidity in developing various chronic health issues including CVD. It is regarded as a vital  
193 component of the socio-economic development of a society and hence effective strategies have  
194 been framed to address deficiencies at the population level by adding emphasis on dietary  
195 improvement, supplementation, food fortification, and global public health control.  
196 Understanding the role of individual micronutrients and proper intake of the essential  
197 micronutrients plays a vital role in preventing micronutrient-related diseases. Micronutrient  
198 deficiency due to malnutrition can be prevented by the above-mentioned strategies. But in the  
199 context of the current study, the knowledge on the role of individual micronutrients and timely  
200 dietary supplementation of micronutrients plays a crucial role in improving physiological  
201 functions [11]. Micronutrients such as vitamins, minerals, and amino acids are known to  
202 improve cardiovascular health by regulating the serum levels of lipids and lipoproteins.  
203 However, the association of micronutrients with cardiovascular markers remains unclear [12].  
204 The present study details the vital micronutrients with significant association with primary  
205 cardiovascular markers such as cholesterol, LDL, HDL, triglycerides, Apo A, Apo B, and  
206 Lp(a). The study specifies a wide range of micronutrients which includes 13 vitamins, 9  
207 minerals, and 8 amino acids.

208 The results of the present study signify a strong positive correlation with high significance  
209 between fat-soluble vitamins Vit A, Vit D3, Vit E, and Vit K1 with cholesterol and  
210 triglycerides. Few studies have discussed the association of fat-soluble vitamins with lipid  
211 profile, Piran et al. [13] attempted to study the association of fat-soluble vitamins A, E, and D.  
212 They reported a correlation only between vitamin E and lipid profile, they also suggested the  
213 supplementation of vitamin E for overweight subjects to decrease LDL-C levels. Several  
214 substantial shreds of evidence have proved that significant changes in mean serum retinol levels  
215 resulting from dietary intake or when supplemented to reduce the risk of cancer alter lipid  
216 metabolism by increasing circulating levels of triglycerides and cholesterol. Pastorino et al.  
217 [14] have stated retinol-induced liver damage by abnormal elevation of alkaline phosphatase  
218 with overconsumption of vitamin A. Several reports have demonstrated the association of  
219 vitamin D with serum lipid profiles, a study by Dibada [15] reported an inverse correlation  
220 where the supplementation of vitamin D resulted in reducing serum cholesterol, LDL, and  
221 triglycerides, but they reported no association between vitamin D and HDL. A randomized trial  
222 by Barbarawi et al. [16] observed no association between vitamin D supplementation and  
223 reduced risk of major adverse cardiovascular events, myocardial infarction, stroke, etc. In the

224 present result, vitamin D was found to have a positive correlation with cholesterol and  
225 triglycerides. As Barbarawi et al. [16] stated the present result also showed no association with  
226 serum HDL. At optimal levels of serum concentrations, vitamin D might be beneficial by  
227 reducing cholesterol, LDL, and triglycerides. High doses of Vit D supplements result in  
228 irregular heartbeat and can also raise blood calcium levels which lead to heart failure (Galior  
229 et al., 2018). An increase in Vit E might interfere with blood clotting by inhibiting platelet  
230 aggregation and Vitamin K-mediated clotting factors which might lead to hemorrhagic stroke  
231 (Natural Medicines Comprehensive Database). Vitamin E below the reference range results in  
232 acute heart muscle damage. Vitamins B9 (folate) were found to have a negative correlation  
233 with cholesterol and Vit D3 was found to have a negative correlation with serum LDL.  
234 Interestingly no vitamins exhibited any significant correlation with HDL and Apo A. The  
235 current results signify that an overdose of fat-soluble vitamins could result in adverse health  
236 effects by modulating serological biomarkers. Water-soluble vitamins tend to accumulate less  
237 in tissues as they are readily soluble in water and excreted [18]. Among all the analyzed  
238 minerals, iron was found to be positively correlated with serum levels of cholesterol ( $r=0.1067$ ,  
239  $p<0.0437$ ) and LDL ( $r=0.1199$ ,  $p<0.0233$ ).

240 Numerous studies have demonstrated the significance of micronutrients on cardiovascular  
241 health. For instance, Ma et al. [19] suggested that the deficiency in levels of trace minerals such  
242 as zinc, copper, iron, and selenium are directly associated with cardiovascular diseases, and  
243 supplementation of these trace elements can prevent CVD. A review by Panchal et al. [20] has  
244 demonstrated the importance of selenium, vanadium, and chromium in improving metabolic  
245 syndrome. Li et al. [21] in their study on plasma metabolomics stated that plasma metabolites  
246 and serum micronutrient levels can be used to predict the risk of CVD. Extensive research has  
247 increased the understanding of the association between micronutrients and cardiac health.  
248 Micronutrients such as vitamins and minerals are widely investigated, whereas amino acids are  
249 hardly investigated. A recent report by Tharrey et al. [22] has detailed the association between  
250 amino acid intake and cardiovascular mortality and they also reported the negative effect of a  
251 few amino acids on cardiac health. The intake of protein and peptide-based health supplements  
252 has increased in recent years which could result in increased levels of non-essential amino  
253 acids, the effect of this on lipid and lipoprotein levels was analyzed in our study.

254 Levels of a few vital minerals such as magnesium, potassium, calcium, and zinc have also been  
255 known to influence cardiac health. For instance, deficiency in levels of magnesium and  
256 potassium results in elevated blood pressure. Calcium levels need to be at an optimum since

257 the deficiency causes pulmonary hypertension, while the excess results in plaque build-up in  
258 arteries.

259 To our knowledge, the present study is the first to report on the association of various amino  
260 acids with serum lipid and lipoprotein components. The study observed a statistical  
261 significance between various amino acids and serum levels of lipids and lipoproteins as  
262 represented in Fig 2. Increased levels of asparagine and glutamine were shown to decrease the  
263 levels of LDL. Deprivation of asparagine and glutamine results in lethal effects on endothelial  
264 cells (EC). The supplementation of these non-essential amino acids can assist in the recovery  
265 of EC, can also fight against nitrification stress, and aid in angiogenesis. A previous report by  
266 Luo et al. [23] on the interactive effects of asparagine and aspartate stated that the subjects with  
267 type 2 diabetes were observed to have low levels of HDL-C and reported a negative correlation  
268 between serum levels of asparagine and HDL-C. Serum levels of glutamine and serine were  
269 found to have no influence on plasma lipids and also regular dietary supplementation of these  
270 amino acids has various clinical advantages [24]. A study by Mansour et al. [25] demonstrated  
271 the advantage of glutamine supplementation as it remarkably reduced the total cholesterol and  
272 blood pressure in patients with type 2 diabetes. They also proposed that supplementation of  
273 glutamine can be an effective pharmaconutrient in controlling diabetes, obesity, and other  
274 chronic metabolic disorders. Similarly, adequate supplementation of serine could help in  
275 increased antioxidant and anti-fatty streak (lesion in the development of atherosclerosis)  
276 activity. The increase in the serum levels of triglycerides is significantly associated with low  
277 serum levels of amino acids such as glutamine, serine, leucine, isoleucine, and valine. An  
278 increase in the serum levels of triglycerides results in atherosclerosis which leads to high  
279 chances of stroke and other related heart diseases [26]. A significant positive association was  
280 observed between elevated levels of Apo B and low serum levels of amino acids such as serine,  
281 and isoleucine. Serum levels of Apo B above adequate levels are associated with the  
282 accumulation of LDL-C and non-HDL-C which are associated with various CVD.

283 The present study brings out an interesting correlation between cardiovascular markers and  
284 BCAA's (branched-chain amino acids). BCAA's, leucine, isoleucine, and valine are nonpolar,  
285 and hydrophobic, and are vital nitrogen sources for the synthesis of glutamine and alanine [27].  
286 Several epidemiological studies have proved the association between BCAAs and increased  
287 risk of type 2 diabetes [28]. The increase in the levels of BCAA's increases the oxidation of  
288 BCAA's in muscles which inhibits the fatty acid oxidation and results in blunted insulin  
289 signaling. Diabetes and CVD are the major causes of morbidity and mortality. A report by

290 Magnusson et al., [28] identified BCAA as a strong predictor of CVD development and also as  
291 an early marker for the association between diabetes and CVD. Another study by Tobias et al.,  
292 [29] proved, that circulating BCAA's as strong predictors of type 2 diabetes. The quantitative  
293 analysis of BCAA's - leucine, isoleucine, and valine with the cardio markers showed a clear  
294 association. A strong negative correlation between HDL and BCAAs and a strong positive  
295 correlation between triglycerides and BCAAs (Table 3). This signifies the increase in the serum  
296 level of BCAA decreases the HDL and increases the triglycerides. While in the case of LDL  
297 and Apo B a positive correlation was observed with serum level of valine which signifies the  
298 increase in the serum levels of valine also increases the levels of LDL and Apo B which could  
299 result in CVD.

300 The present results identify a few micronutrients with the possibility of being pathogenic, for  
301 instance, the positive correlation between vitamin D and serum cholesterol and LDL. The same  
302 association has been previously reported by numerous studies including a report by Giri et al.  
303 [30]. Grimes [31] has reported that in the absence of sunlight the inactive vitamin D is diverted  
304 to the synthesis of cholesterol. Even so, intestinal absorption is the only source of fat-soluble  
305 vitamins and their mechanism of intestinal absorption remains unclear. Recent studies revealed  
306 the participation of several membrane proteins in cholesterol absorption evidenced by  
307 advancements in genome-editing, genome-wide association, and gene mutation analysis on  
308 cholesterol and intense studies in cholesterol absorption inhibitors. Interestingly, these analyses  
309 also revealed that cholesterol transporters can also transport fat-soluble vitamins [32]. In  
310 association with these studies, the present study identifies the serum levels of fat-soluble  
311 vitamins as effective markers of elevated cholesterol transportation and can be used as an early  
312 predictor of CVD. It's a well-established fact that increased serum BCAA was associated with  
313 elevated triglycerides and reduced HDL [33]. The present results also identify a similar  
314 pathology between serum HDL, Triglycerides and BCAA. The BCAA in the present study  
315 exhibited a significant negative correlation with HDL and a strong positive correlation with  
316 triglycerides. Consumption of energy-dense and high-palatable foods has increased in recent  
317 years, and consumption of BCAAs is one such major behavioral change received considerable  
318 attention in recent times. The most recent study by Latimer et al. (2021) reported that an  
319 increase in BCAA consumption resulted in the dramatic growth of the heart and also increased  
320 the progression of cardiac diseases.

321 One of the main limitations of our study is that it includes data from free-living people with  
322 limited information on diet and lifestyle choices. The current study signifies the association of

323 vital cardio markers with a diverse class of micronutrients. Further research is required for a  
324 better understanding of the clinical significance of these micronutrients and also to understand  
325 the biochemical interference of vitamins, minerals, and amino acids in lipid metabolism.

## 326 **Conclusions**

327 The current study examines the explicit correlation of micronutrients with various cardio  
328 markers. Given the broad set of micronutrients evaluated their significance in regulating vital  
329 cardio markers was better understood. The study highlights the negative correlation of various  
330 vitamins and amino acids on cardiovascular health which was a significant observation. The  
331 deficiency of various micronutrients leads to a significant increase in cardiovascular disease  
332 risk due to dysregulation of lipid and lipoprotein markers. Similarly increased levels of certain  
333 micronutrients especially branched-chain amino acids lead to increased cardiovascular risk due  
334 to lipid and lipoprotein dysregulation. It is important to look at both deficiencies and  
335 overconsumption of micronutrients to optimize nutrient intake. The study suggests the proper  
336 monitoring of body vitals and optimal intake of micronutrients are to be considered for their  
337 effective roles in metabolic pathways to implement a risk reduction strategy for cardiovascular  
338 health.

339

340

341

342

343

344

345

346

347

348

349

350

351

## 352 **Acknowledgments**

353 We thank Qingqing Yue, Junior Graphic Designer for assisting with designing figures and  
354 Vibrant America LLC for supporting this research.

## 355 **Statement of Ethics**

356 An ethics statement was not required for this study type

## 357 **Author Contributions**

358 Hari Krishnamurthy, Karthik Krishna, and Tianhao Wang performed the research. Hari  
359 Krishnamurthy, John J. Rajasekaran, Karenah Rajasekaran, and Vasanth Jayaraman designed  
360 the study. Qi Song, Kang Bei, and Swarnkumar Reddy analyzed the data. Hari Krishnamurthy  
361 and Swarnkumar Reddy wrote the article.

## 362 **Conflicts of Interest**

363 Krishnamurthy, Jayaraman, Krishna, Wang, Bei, and Rajasekaran are employees of Vibrant  
364 Sciences LLC. Reddy, Song, and Rajasekaran are employees of Vibrant America LLC. Vibrant  
365 America is a commercial diagnostic lab that could benefit from increased testing of  
366 micronutrients and cardiovascular biomarkers.

## 367 **Institutional Review Board Statement**

368 IRB exemption (work order #1-1098539-1) was determined by the Western Institutional  
369 Review Board (WIRB) for Vibrant America Biorepository to use de-linked and deidentified  
370 remnant human specimen and medical data for research purposes.

## 371 **Data Availability**

372 All relevant data are within the manuscript and its Supporting Information files. Any  
373 additional data will be available upon request from Vibrant America LLC by sending an  
374 email to our bioinformatics team at [bioinformatics@vibrant-america.com](mailto:bioinformatics@vibrant-america.com) or  
375 [hari@vibrantsci.com](mailto:hari@vibrantsci.com)

## 376 **Supplementary Material**



377 Table S1: Association of serum cholesterol with micronutrients  
378 Table S2: Association of serum LDL with micronutrients  
379 Table S3: Association of serum HDL with micronutrients  
380 Table S4: Association of serum triglycerides with micronutrients  
381 Table S5: Association of serum Apo A with micronutrients  
382 Table S6: Association of serum Apo B with micronutrients  
383 Table S7: Association of serum Lipoprotein A with micronutrients  
384 Table S8: Pearson correlation between serum cholesterol and micronutrients  
385 Table S9: Pearson correlation between serum LDL and micronutrients  
386 Table S10: Pearson correlation between serum HDL and micronutrients  
387 Table S11: Pearson correlation between serum triglycerides and micronutrients  
388 Table S12: Pearson correlation between serum Apo A and micronutrients  
389 Table S13: Pearson correlation between serum Apo B and micronutrients  
390 Table S14: Pearson correlation between serum lipoprotein A and micronutrients

## 391 **References**

- 392 1. Getz, G.S. and Reardon, C.A., 2007. Nutrition and cardiovascular disease. *Arterioscler*  
393 *Thromb Vasc Biol.* **2007**, **27**, 2499.
- 394 2. Tappia, P.S. and Blewett, H. Nutrition and cardiovascular health. *Int. J. Mol. Sci.* **2020**,  
395 *21(7)*, 2284.
- 396 3. Chiu, H.F., Venkatakrishnan, K., Golovinskaia, O. and Wang, C.K. Impact of  
397 Micronutrients on Hypertension: Evidence from Clinical Trials with a Special Focus  
398 on Meta-Analysis. *Nutrients* **2021**, *13*, 588.
- 399 4. Kkeveetil, C.V., Thomas, G. and Chander, S.J.U. Role of micronutrients in congestive  
400 heart failure: A systematic review of randomized controlled trials. *Tzu Chi Medical*  
401 *Journal.* **2016** *28 (4)*, 143-150.
- 402 5. Ekpenyong CE. Micronutrient vitamin deficiencies and cardiovascular disease risk:  
403 advancing current understanding. *Eur J Prev Med.* **2017**, *5*, 1.

- 404 6. Islam MZ, Shamim AA, Ahmed A, Akhtaruzzaman M, Kärkkäinen M, Lamberg-  
405 Allardt C. Effect of vitamin D, calcium and multiple micronutrients supplementation  
406 on lipid profile in pre-menopausal Bangladeshi garment factory workers with  
407 hypovitaminosis D. *J Health Popul Nutr.* **2014**, *32*, 687.
- 408 7. Lima, L.W., Checchio, M.V., dos Reis, A.R., de Cássia Alves, R., Tezzoto, T. and  
409 Grato, P.L. Selenium restricts cadmium uptake and improve micronutrients and  
410 proline concentration in tomato fruits. *Biocatal. Agric. Biotechnol.* **2019**, *18*, 101057.
- 411 8. Liu, L., Yin, X., Ikeda, K., Sullivan, D.H. and Eisen, H.J. Micronutrients, inflammation  
412 and congestive heart failure among the elderly: nutritional perspectives on primary  
413 prevention and clinical treatment. *Clin. Exp. Pharmacol. Physiol.* **2007**, *34*, S14-S16.
- 414 9. Cascino TM, Hummel SL. Nutrient deficiencies in heart failure: a micro problem with  
415 macro effects? *J. Am. Heart Assoc.* **2018**, *7(17)*, e010447.
- 416 10. Rai K, N., Kumari, N. S., Gowda Km, D., & Kr, S. The Evaluation of Micronutrients  
417 and Oxidative Stress and their Relationship with the Lipid Profile in Healthy adults. *J.*  
418 *Clin. Diagnostic Res.* **2013**, *7(7)*, 1314–1318.
- 419 11. Bruins MJ, Kupka R, Zimmermann MB, Lietz G, Engle-Stone R, Kraemer K.  
420 Maximizing the benefits and minimizing the risks of intervention programs to address  
421 micronutrient malnutrition: symposium report. *Matern Child Nutr.* **2016**, *12*, 940.
- 422 12. Ma, X., Jiang, S., Yan, S., Li, M., Wang, C., Pan, Y., Sun, C., Jin, L., Yao, Y. and Li,  
423 B. Association between copper, zinc, Iron, and selenium intakes and TC/HDL-C ratio  
424 in US adults. *Biol. Trace Elem. Res.* **2020**, *197(1)*, 43-51.
- 425 13. Piran, S., Sarmasti, S., Shabani, M., Kakavandi, N., Hosseni, B., Khosravi, M., Resaee,  
426 S., Soltanmohammadi, E., Naseri, F., Mohammadi, A. and Najafi, M. Association  
427 Between Fat-soluble Vitamins and Lipid Profile in the Overweight Population. *Recent*  
428 *Pat. food, Nutr. Agric.* **2020**, *11(1)*, 56-62.
- 429 14. Pastorino, U., Chiesa, G., Infante, M., Soresi, E., Clerici, M., Valente, M., Belloni, P.A.  
430 and Ravasi, G., 1991. Safety of high-dose vitamin A. *Oncology*, **1991**, *48(2)*, 131-137.
- 431 15. Dibaba DT. Effect of vitamin D supplementation on serum lipid profiles: a systematic  
432 review and meta-analysis. *Nutr Rev.* **2019**, *77(12)*, 890-902.
- 433 16. Barbarawi M, Kheiri B, Zayed Y, Barbarawi O, Dhillon H, Swaid B, Yelangi A, Sundus  
434 S, Bachuwa G, Alkotob ML, Manson JE. Vitamin D Supplementation and  
435 Cardiovascular Disease Risks in More Than 83 000 Individuals in 21 Randomized  
436 Clinical Trials: A Meta-analysis. *JAMA Cardiol.* **2019**, *4(8)*, 765-776.

- 437 17. Galior K, Grebe S, Singh R. Development of Vitamin D Toxicity from Overcorrection  
438 of Vitamin D Deficiency: A Review of Case Reports. *Nutrients*, **2018**, *10(8)*, 953.
- 439 18. Lykstad J, Sharma S. *Biochemistry, Water Soluble Vitamins*. StatPearls Publishing,  
440 Treasure Island (FL); 2021. PMID: 30860745.
- 441 19. Ma, X., Jiang, S., Yan, S., Li, M., Wang, C., Pan, Y., Sun, C., Jin, L., Yao, Y. and Li,  
442 B. Association between copper, zinc, iron, and selenium intakes and TC/HDL-C ratio  
443 in US adults. *Biol. Trace Elem. Res.* **2020**, *197(1)*, 43-51.
- 444 20. Panchal, S.K., Wanyonyi, S. & Brown, L. Selenium, Vanadium, and Chromium as  
445 Micronutrients to Improve Metabolic Syndrome. *Curr Hypertens Rep.* **2017**, *19(3)*, 1-  
446 11.
- 447 21. Li, K.J., Jenkins, N., Luckasen, G., Rao, S., and Ryan, E.P. Plasma metabolomics of  
448 children with aberrant serum lipids and inadequate micronutrient intake. *PLoS one.*  
449 **2018**, *13(10)*, p.e0205899.
- 450 22. Tharrey, M., Mariotti, F., Mashchak, A., Barbillon, P., Delattre, M., Huneau, J.F. and  
451 Fraser, G.E. Patterns of amino acid intake are strongly associated with cardiovascular  
452 mortality, independently of the sources of protein. *Int J Epidemiol*, **2020**, *49(1)*, 312-  
453 321
- 454 23. Luo, H.H., Feng, X.F., Yang, X.L., Hou, R.Q. and Fang, Z.Z., 2020. Interactive effects  
455 of asparagine and aspartate homeostasis with sex and age for the risk of type 2 diabetes  
456 risk. *Biol. Sex Differ.* **2020**, *11(1)*, 1-10.
- 457 24. Xiao, F., Du, Y., Lv, Z., Chen, S., Zhu, J., Sheng, H. and Guo, F. Effects of essential  
458 amino acids on lipid metabolism in mice and humans. *J. Mol. Endocrinol.* **2016**, *57(4)*,  
459 223-231.
- 460 25. Mansour, A., Mohajeri-Tehrani, M.R., Qorbani, M., Heshmat, R., Larijani, B. and  
461 Hosseini, S. Effect of glutamine supplementation on cardiovascular risk factors in  
462 patients with type 2 diabetes. *Nutrition*, **2015**, *31(1)*, 119-126.
- 463 26. Park, M.S.C. and Liepa, G.U. Effects of dietary protein and amino acids on the  
464 metabolism of cholesterol-carrying lipoproteins in rats. *J Nutr.* **1982**, *112(10)*, 1892-  
465 1898.
- 466 27. Szpetnar, M., Luchowska-Kocot, D., Boguszewska-Czubara, A. et al. The Influence of  
467 Manganese and Glutamine Intake on Antioxidants and Neurotransmitter Amino Acids  
468 Levels in Rats' Brain. *Neurochem Res.* **2016**, *41*, 2129–2139.

- 469 28. Martin Magnusson, Olle Melander, Bo Israelsson, Anders Grubb, Leif Groop, Stefan  
470 Jovinge; Elevated Plasma Levels of Nt-proBNP in Patients with Type 2 Diabetes  
471 Without Overt Cardiovascular Disease. *Diabetes Care*, **2004**, *27* (8), 1929–1935.
- 472 29. Tobias, D. K., Mora, S., Verma, S., & Lawler, P. R. Altered branched chain amino acid  
473 metabolism: toward a unifying cardiometabolic hypothesis. *Curr. Opin. Cardiol.* **2018**,  
474 *33*(5), 558–564.
- 475 30. Giri, R., Rai, R., Verma, R.K. and Verma, S. Correlation between Vitamin D and lipid  
476 profile in patients with ischemic stroke. *Int J Res Med Sci.* **2016**, *4*(6), 2309-12.
- 477 31. Grimes, D.S., Hindle, E. and Dyer, T. Sunlight, cholesterol and coronary heart disease.  
478 *QJM: Int. J. Med.* **1996**, *89*(8), 579-590.
- 479 32. Yamanashi, Y., Takada, T., Kurauchi, R., Tanaka, Y., Komine, T. and Suzuki, H.  
480 Transporters for the intestinal absorption of cholesterol, vitamin E, and vitamin K. *J.*  
481 *Atheroscler. Thromb.* **2017**, *24*, 16007.
- 482 33. Yang, P., Hu, W., Fu, Z., Sun, L., Zhou, Y., Gong, Y., Yang, T. and Zhou, H., 2016.  
483 The positive association of branched-chain amino acids and metabolic dyslipidemia in  
484 Chinese Han population. *Lipids Health Dis.* **2016**, *15*(1), 1-8.
- 485 34. Latimer, M.N., Sonkar, R., Mia, S., Frayne, I.R., Carter, K.J., Johnson, C.A., Rana, S.,  
486 Xie, M., Rowe, G.C., Wende, A.R. and Prabhu, S.D., 2021. Branched chain amino acids  
487 selectively promote cardiac growth at the end of the awake period. *J. Mol. Cell. Cardiol.*  
488 **2021**, *157*, 31-44.

489

490

491

492

493

494

495

496

497

498

499  
500  
501  
502  
503  
504

Table S1: Association of serum cholesterol with micronutrients

|                 | Greater than Reference Range (n=62) |                    | Within range (n=278) |                   | P (P<0.05) |
|-----------------|-------------------------------------|--------------------|----------------------|-------------------|------------|
| ASPARAGINE      | 53.8±12.7                           | 51.4(34.1-93.1)    | 54.1±12.7            | 52.9(28-113.0)    | 0.8067     |
| GLUTAMINE       | 505.7±82.7                          | 512.8(210-752)     | 504.2±80.6           | 503.1(202.2-741)  | 0.8270     |
| SERINE          | 144.9±34.3                          | 138(75-213.4)      | 149.3±35.3           | 146.1(59.6-282.9) | 0.2869     |
| CYSTEINE        | 17.3±8.7                            | 17.0(2.2-46.2)     | 17.7±8.9             | 16.2 (1.3-45.2)   | 0.8426     |
| SELENIUM        | 139±32                              | 140.1(-47-207.5)   | 143.3±30.5           | 139 (93.4-360.4)  | 0.8771     |
| VITAMIN E       | 16±5.7                              | 14.4 (7.9-29.4)    | 12.9±4.2             | 11.9 (5.3-30.7)   | 0.0001     |
| CHOLINE         | 14.4±5.6                            | 13.3(6.1-35.1)     | 14.1±5.7             | 12.5(1.0-39.6)    | 0.5605     |
| CARNITINE       | 28.8±7.7                            | 29.1 (12.6-44.3)   | 26.5±7.1             | 26.6(4.1-50.5)    | 0.0317     |
| SODIUM          | 141.9±2.9                           | 142 (137-148)      | 140.1±22.0           | 141 (-222-155)    | 0.2091     |
| POTASSIUM       | 4.5±0.4                             | 4.6 (3.1-5.6)      | 4.5±0.47             | 4.4 (3.72-6.22)   | 0.1658     |
| CALCIUM         | 9.8±0.3                             | 9.8(9-10.6)        | 9.6±0.4              | 9.6 (8.5-11.2)    | 0.0001     |
| MANGANESE       | 0.6±0.2                             | 0.6 (0.3-1.7)      | 0.7±0.4              | 0.6 (0.2-6.8)     | 0.6281     |
| ZINC            | 0.7±0.1                             | 0.7 (0.4-.9)       | 0.7±0.1              | 0.6 (0.3-2.2)     | 0.0160     |
| COPPER          | 1.0±0.2                             | 0.9 (0.6-2.1)      | 1.05±0.3             | 1.0 (0.3-3.4)     | 0.7309     |
| CHROMIUM        | 0.2±0.1                             | 0.2 (0.05-0.6)     | 0.2±0.1              | 0.22 (0.01-1.7)   | 0.6393     |
| IRON            | 108.7±33.3                          | 102.0 (34.8-206.5) | 101.9±38.8           | 99.9 (25.3-238.9) | 0.1217     |
| MAGNESIUM       | 2.2±0.1                             | 2.2 (1.9-2.6)      | 2.1±0.1              | 2.1 (1.0-2.6)     | 0.0001     |
| VITAMIN A       | 80.7±25.1                           | 77.8(34.1-142.9)   | 76.0±23.6            | 71.5 (37.4-151.9) | 0.0942     |
| VITAMIN_B1      | 21.3±13.5                           | 19.4 (1.0-70.3)    | 21.6±15.0            | 18.3 (0.8-136.8)  | 0.8489     |
| VITAMIN_B2      | 26.8±25.3                           | 19.4 (6.2-174.1)   | 28.1±21.9            | 21.9 (4.8-140.8)  | 0.4462     |
| VITAMIN_B3      | 17.4±7.2                            | 18.1 (3.4-34.6)    | 19.7±8.8             | 19.1 (2.7-110.1)  | 0.0559     |
| VITAMIN_B6      | 15.3±13.0                           | 11.3 (1.1-70.8)    | 17.5±19.6            | 12.3 (1.6-236.7)  | 0.4704     |
| VITAMIN_B12     | 787.9±358.1                         | 758 (245.1-1958)   | 719±319              | 650 (196-1923)    | 0.1395     |
| VITAMIN_B5      | 99.6±74.4                           | 70.8 (23.5-315.2)  | 107.5±89.2           | 71.0 (13.8-482.1) | 0.6705     |
| VITAMIN_C       | 0.4±0.2                             | 0.4 (.05-1.2)      | 0.4±0.3              | 0.3 (.05-3.74)    | 0.5634     |
| VITAMIN_D3      | 1.1±0.2                             | 1.1 (0.4-1.7)      | 0.8±0.2              | 0.8 (0.3-1.6)     | 0.0001     |
| VITAMIN_K1      | 2.1±1.5                             | 1.5 (0.1-7.3)      | 1.4±1.3              | 1.2 (0.05-13.9)   | 0.0003     |
| VITAMIN_K2      | 0.8±1.7                             | 0.2 (0.11-11.2)    | 0.6±1.0              | 0.2 (0.1-11.0)    | 0.1909     |
| FOLATE          | 13.6±4.4                            | 13.6(2.9-19.9)     | 13.6±3.9             | 13.9 (2.8-19.9)   | 0.8426     |
| VITAMIN D 25 OH | 50.2±26.6                           | 41.2 (11.4-133)    | 46.5±22.5            | 40.9 (8.8-136)    | 0.5307     |

|            |            |                    |            |                    |        |
|------------|------------|--------------------|------------|--------------------|--------|
| ISOLEUCINE | 68.0±17.2  | 66.9 (35.7-115.7)  | 68.4±21.1  | 64.6 (24.0-142.7)  | 0.6996 |
| VALINE     | 255.7±54.7 | 248.3 (146.5-400)  | 242.3±55.4 | 233.2 (134.9-442)  | 0.0484 |
| LEUCINE    | 166.5±37.4 | 159.0 (79.7-247.6) | 162.6±34.2 | 159.1 (80.3-249.2) | 0.5826 |
| CITRULLINE | 31.4±7.6   | 31.3 (17.3-52.1)   | 29.6±8.1   | 28.8 (10.1-69.3)   | 0.0774 |
| ARGININE   | 121.8±32   | 117.5 (65.1-220.6) | 123.2±33.8 | 119.1 (49.6-299.2) | 0.7459 |

505

506

507

508

Table S2: Association of serum LDL with micronutrients

|                 | Greater than Reference<br>Range (n=146) |                    | Within range (n=212) |                    | P<br>(P<0.05) |
|-----------------|-----------------------------------------|--------------------|----------------------|--------------------|---------------|
| ASPARAGINE      | 52.9±11.2                               | 51.7(31.1-108.0)   | 54.8±12.7            | 53.1(28.1-113.0)   | 0.2238        |
| GLUTAMINE       | 496.9±80.5                              | 502.3(204.1-752.4) | 510.6±80.3           | 507.6(202.2-741.1) | 0.1594        |
| SERINE          | 148.4±33.9                              | 144.1(75-227.9)    | 148.4±35.4           | 146.4(59.6-282.9)  | 0.9280        |
| CYSTEINE        | 18.5±8.7                                | 17.9(2.8-46.2)     | 17.3±9.1             | 15.6(1.3-45.2)     | 0.1121        |
| SELENIUM        | 142.2±23.6                              | 139.4(93.4-210.8)  | 143.6±32.1           | 141.4(95.7-360.4)  | 0.8131        |
| VITAMIN E       | 14.8±4.8                                | 13.6(7.3-29.4)     | 12.3±4.2             | 11.2(5.3-30.7)     | 0.0001        |
| CHOLINE         | 14.2±5.6                                | 13.0(5.8-39.6)     | 14.0±5.7             | 12.6(1.0-36.6)     | 0.7838        |
| CARNITINE       | 28.0±7.3                                | 28.3(10.2-50.5)    | 26.1±7.1             | 26.3(4.1-43.6)     | 0.0258        |
| SODIUM          | 141.7±3.4                               | 142 (133-151)      | 139.7±25.1           | 141(129-155)       | 0.3443        |
| POTASSIUM       | 4.5±0.3                                 | 4.5(3.1-5.6)       | 4.5±0.4              | 4.5(3.6-6.2)       | 0.7340        |
| CALCIUM         | 9.6±0.3                                 | 9.6 (8.5-10.6)     | 89.6±0.4             | 9.6(8.6-11.2)      | 0.5248        |
| MANGANESE       | 0.69±0.26                               | 0.63(0.2-1.85)     | 0.74±0.54            | 0.63(0.3-6.82)     | 0.9838        |
| ZINC            | 0.72±0.12                               | 0.71(0.39-1.39)    | 0.70±0.18            | 0.67(0.44-2.23)    | 0.0373        |
| COPPER          | 1.05±0.29                               | 1.02(0.37-2.53)    | 1.05±0.31            | 1.0 (0.4-3.4)      | 0.8362        |
| CHROMIUM        | 0.2±0.1                                 | 0.2(0.02-1.0)      | 0.26±0.17            | 0.2(0.011-1.79)    | 0.4714        |
| IRON            | 108±33.3                                | 108.1(35.5-201.8)  | 99.1±41.4            | 91.4(25.3-238.9)   | 0.0024        |
| MAGNESIUM       | 2.23±0.16                               | 2.2(1.5-2.66)      | 2.16±0.19            | 2.1(1.0-2.6)       | 0.0002        |
| VITAMIN A       | 78.3±22.7                               | 74.6(34.1-151.5)   | 76.2±24.8            | 72.2(37.1-151.9)   | 0.2012        |
| VITAMIN_B1      | 20.8±13.5                               | 18.0(1.0-75.9)     | 22.4±15.9            | 18.8(0.83-136.8)   | 0.4553        |
| VITAMIN_B2      | 27.2±22.8                               | 21.1(5.7-174.1)    | 29.2±25.8            | 21.6(4.8-222.5)    | 0.7505        |
| VITAMIN_B3      | 19.4±10.5                               | 18.6(3.4-110.1)    | 19.0±6.7             | 18.2(2.7-40.6)     | 0.7766        |
| VITAMIN_B6      | 16.0±13.2                               | 12.2(1.1-84.2)     | 18.2±21.3            | 12.3(1.4-236.7)    | 0.6179        |
| VITAMIN_B12     | 744.3±328.8                             | 657.2(245.1-1958)  | 726.1±323.4          | 663.9(196-1923)    | 0.6856        |
| VITAMIN_B5      | 103.6±87.5                              | 70.6(13.8-482.1)   | 111.1±9.2            | 71.5(19.2-407.4)   | 0.5429        |
| VITAMIN_C       | 0.45±0.29                               | 0.41(0.05-2.62)    | 0.45±0.31            | 0.39(0.08-3.74)    | 0.7418        |
| VITAMIN_D3      | 1.04±0.26                               | 1.02(0.44-1.78)    | 0.84±0.81            | 0.81(0.32-1.63)    | 0.0001        |
| VITAMIN_K1      | 1.65±1.2                                | 1.29(0.05-7.32)    | 1.56±1.4             | 1.25(0.15-13.9)    | 0.3875        |
| VITAMIN_K2      | 0.68±1.2                                | 0.28(0.10-11.2)    | 0.72±1.17            | 0.29(0.082-11.0)   | 0.5063        |
| FOLATE          | 13.8±4.0                                | 14.1(2.9-19.9)     | 13.6±3.9             | 13.9(2.8-19.9)     | 0.5133        |
| VITAMIN D 25 OH | 47.8±22.6                               | 41.5(10.4-133)     | 46.3±23.5            | 40.5(8.8-136)      | 0.3757        |

|            |            |                    |            |                    |        |
|------------|------------|--------------------|------------|--------------------|--------|
| ISOLEUCINE | 69.0±20.1  | 67.0(31.0-139.7)   | 68.6±21.0  | 64.4(24.0-142.7)   | 0.6712 |
| VALINE     | 250.5±55.1 | 242.0(146.5-442.7) | 241.1±54.2 | 232.5(134.9-442.4) | 0.0903 |
| LEUCINE    | 166.4±35.1 | 159.3(79.7-248.2)  | 161.5±34.4 | 158.2(87.7-249.2)  | 0.2160 |
| CITRULLINE | 30.1±7.6   | 29.4(10.3-51.8)    | 29.9±8.3   | 28.8(10.1-69.3)    | 0.7509 |
| ARGININE   | 122.2±33.2 | 118.9(61.0-220.6)  | 123.3±33.8 | 118.4(49.6-299.2)  | 0.7600 |

509

510

511

512

Table S3: Association of serum HDL with micronutrients

|                 | Less than Reference<br>Range (n=36) |                   | Within range (n=301) |                    | P<br>(P<0.05) |
|-----------------|-------------------------------------|-------------------|----------------------|--------------------|---------------|
| ASPARAGINE      | 105.6±42.6                          | 110.1(34.1-220.6) | 53.9±11.6            | 52.9(28.1-108.0)   | 0.0001        |
| GLUTAMINE       | 212.5±164.3                         | 124.6(61.0-671.4) | 508.6±80.7           | 510.9(202.2-752.4) | 0.0001        |
| SERINE          | 128.0±36.2                          | 124.7(61.0-282.9) | 149.4±34.2           | 145.6(59.6-274.5)  | 0.0001        |
| CYSTEINE        | 20.4±7.8                            | 20.1(6.7-42.7)    | 17.8±9.5             | 16.5(2.5-46.2)     | 0.0364        |
| SELENIUM        | 141.1±24.8                          | 142.2(96.8-210.8) | 143.0±31.5           | 140.6(93.4-360.4)  | 0.7682        |
| VITAMIN E       | 15.8±5.3                            | 16.2(6-30.7)      | 13.2±4.5             | 12.1(5.3-29.4)     | 0.0011        |
| CHOLINE         | 13.3±4.8                            | 11.7(6.1-27.3)    | 14.2±5.8             | 12.9(1.0-39.6)     | 0.3783        |
| CARNITINE       | 27.3±6.6                            | 26.9(12.8-40.3)   | 26.9±7.3             | 27.2(4.1-50.5)     | 0.7748        |
| SODIUM          | 141.5±3.5                           | 142(134-150)      | 141.4±3.2            | 141(129-155)       | 0.9044        |
| POTASSIUM       | 4.4±0.43                            | 4.3(3.1-5.3)      | 4.5±0.39             | 4.5(3.6-6.2)       | 0.2055        |
| CALCIUM         | 9.6±0.5                             | 9.5(8.8-11.2)     | 9.6±0.3              | 9.6(8-11.1)        | 0.3304        |
| MANGANESE       | 0.70±0.2                            | 0.68(0.32-1.2)    | 0.72±0.4             | 0.62(0.2-6.8)      | 0.3071        |
| ZINC            | 0.68±0.1                            | 0.6(0.4-0.9)      | 0.7±0.1              | 0.6(0.3-2.2)       | 0.2098        |
| COPPER          | 1.1±0.3                             | 1.0(0.4-2.5)      | 1.04±0.30            | 0.9(0.3-3.4)       | 0.3136        |
| CHROMIUM        | 0.23±0.10                           | 0.21(0.06-0.52)   | 0.2±0.16             | 0.2(0.01-1.7)      | 0.6318        |
| IRON            | 92.2±33.6                           | 86.5(25.3-192.1)  | 104.1±38.2           | 100(29.8-238.9)    | 0.0983        |
| MAGNESIUM       | 2.1±0.2                             | 2.1(1.2-2.5)      | 2.1±0.18             | 2.2(1.0-2.6)       | 0.8566        |
| VITAMIN A       | 84.8±27.0                           | 80.0(43.3-151.9)  | 76.7±23.9            | 72.3(34.1-151.5)   | 0.0661        |
| VITAMIN_B1      | 21.1±14.0                           | 17.7(1.0-56.8)    | 21.4±15.0            | 18.4(0.8-136.8)    | 0.8646        |
| VITAMIN_B2      | 21.8±14.3                           | 17.2(6.4-64.2)    | 28.1±21.8            | 22.0(4.8-140.8)    | 0.0848        |
| VITAMIN_B3      | 19.4±5.5                            | 19.4(5.4-30.3)    | 19.4±8.8             | 18.9(2.7-110.1)    | 0.7625        |
| VITAMIN_B6      | 13.5±13.6                           | 9.1(2.9-80.9)     | 17.6±19.0            | 12.4(1.1-236.7)    | 0.1048        |
| VITAMIN_B12     | 642±304.0                           | 532.2(245.1-1593) | 742.3±331.1          | 674.3(150-1958)    | 0.0509        |
| VITAMIN_B5      | 104.3±84.9                          | 71.8(25.8-330.0)  | 106.0±87.9           | 68.3(13.8-482.1)   | 0.8070        |
| VITAMIN_C       | 0.43±0.23                           | 0.39(0.08-0.88)   | 0.44±0.29            | 0.39(0.05-3.74)    | 0.9910        |
| VITAMIN_D3      | 0.93±0.24                           | 0.93(0.41-1.46)   | 0.92±0.27            | 0.88(0.32-1.78)    | 0.5533        |
| VITAMIN_K1      | 2.3±2.7                             | 1.6(0.2-13.9)     | 1.5±1.0              | 1.2(0.05-7.3)      | 0.0290        |
| VITAMIN_K2      | 0.74±0.87                           | 0.32(0.10-3.8)    | 0.71±1.2             | 0.28(0.082-11.2)   | 0.2940        |
| FOLATE          | 12.0±4.1                            | 11.0(2.9-19.6)    | 13.7±3.9             | 13.9(2.8-19.9)     | 0.0146        |
| VITAMIN D 25 OH | 40.7±24.9                           | 33.6(12.4-136)    | 48.3±22.8            | 41.7(8.8-133)      | 0.0091        |

|            |            |                    |            |                    |        |
|------------|------------|--------------------|------------|--------------------|--------|
| ISOLEUCINE | 76.8±24.3  | 73.2(35.7-142.7)   | 67.9±20.2  | 65.1(24.0-139.7)   | 0.0193 |
| VALINE     | 256.6±57.0 | 247.8(175.3-363.9) | 244.1±54.8 | 234.8(134.9-442.1) | 0.2253 |
| LEUCINE    | 169.3±35.8 | 168.7(113.7-241.0) | 163.4±34   | 158.3(80.3-249.2)  | 0.3703 |
| CITRULLINE | 28.3±8.3   | 28.7(10.3-44.9)    | 30.2±8.0   | 29.1(10.1-69.3)    | 0.3014 |
| ARGININE   | 129.6±33.0 | 119.5(78.3-205.3)  | 122.5±34.1 | 119.2(49.6-299.2)  | 0.3083 |

513

514

515

516

Table S4: Association of serum triglycerides with micronutrients

|                 | Greater than Reference Range<br>(n=36) |                    | Within range (n=323) |                   | P<br>(P<0.05) |
|-----------------|----------------------------------------|--------------------|----------------------|-------------------|---------------|
| ASPARAGINE      | 53.4±15.5                              | 49.9(31.1-118.7)   | 54.3±12.2            | 53.1(28.1-113.0)  | 0.3363        |
| GLUTAMINE       | 463.7±107.6                            | 472.9(118.7-608.3) | 508.4±78.7           | 507.6(202.2-752)  | 0.0290        |
| SERINE          | 136.5±32.8                             | 130.6(76.0-198.5)  | 149.6±34.7           | 145.6(59.6-282.9) | 0.0368        |
| CYSTEINE        | 22.1±18.1                              | 19.4(4.9-118.7)    | 17.6±9.1             | 15.7(1.3-46.2)    | 0.0573        |
| SELENIUM        | 142.6±22.8                             | 141(96.8-207.5)    | 143.0±29.5           | 140.2(93.4-360.4) | 0.7712        |
| VITAMIN E       | 20.1±17                                | 16.7(8.5-118.7)    | 12.9±4.3             | 11.9(5.3-29.4)    | 0.0001        |
| CHOLINE         | 17.8±18.1                              | 14.1(7.0-118.7)    | 14.0±5.7             | 12.6(1.0-39.6)    | 0.1661        |
| CARNITINE       | 32.6±16.5                              | 31.5(11.6-118.7)   | 26.5±7.2             | 26.6(4.1-50.5)    | 0.0014        |
| SODIUM          | 141.5±4.8                              | 142.5(118.7-150)   | 141.5±3.4            | 141(129-155)      | 0.3449        |
| POTASSIUM       | 7.7±19.0                               | 4.5(4.1-118.7)     | 4.5±0.3              | 4.5 (3.1-6.2)     | 0.6792        |
| CALCIUM         | 12.8±18.1                              | 9.7(9.0-118.7)     | 9.6±0.4              | 9.6(8.2-11.1)     | 0.0518        |
| MANGANESE       | 0.7±0.2                                | 0.67(0.32-1.5)     | 0.72±0.46            | 0.63(0.2-6.8)     | 0.1321        |
| ZINC            | 0.68±0.13                              | 0.702(0.4-1.0)     | 0.71±0.16            | 0.69(0.39-2.23)   | 0.5508        |
| COPPER          | 1.01±0.23                              | 1.0(0.48-1.5)      | 1.0±0.3              | 1.0(0.3-3.4)      | 0.6959        |
| CHROMIUM        | 0.23±0.11                              | 0.22(0.05-0.51)    | 0.25±0.16            | 0.22(0.01-1.7)    | 0.6972        |
| IRON            | 101.2±29.1                             | 97.5(50.7-160)     | 102.8±39.5           | 100(25.3-238.9)   | 0.9361        |
| MAGNESIUM       | 2.2±0.15                               | 2.2(1.9-2.6)       | 2.1±0.19             | 2.2(1.0-2.6)      | 0.7556        |
| VITAMIN A       | 88.4±27.3                              | 82(52.8-151.9)     | 75.8±23.3            | 72.1(34.1-151.5)  | 0.0061        |
| VITAMIN_B1      | 19.8±15.7                              | 16.9(1.0-66.4)     | 21.9±14.9            | 18.6(0.8-136.8)   | 0.2701        |
| VITAMIN_B2      | 26.8±15.5                              | 24.5(6.2-64.7)     | 27.9±22.9            | 20.8(4.8-174.1)   | 0.4594        |
| VITAMIN_B3      | 17.5±5.6                               | 16.9(8.7-27.8)     | 19.4±8.7             | 18.9(2.7-110.1)   | 0.1979        |
| VITAMIN_B6      | 13.2±10.8                              | 9.8(2.9-49.1)      | 17.7±19.0            | 12.4(1.1-236.7)   | 0.1156        |
| VITAMIN_B12     | 688.9±321.3                            | 552.1(281.5-1593)  | 738.2±325.9          | 667.8(196-1958)   | 0.2503        |
| VITAMIN_B5      | 112.6±97.3                             | 70.5(27.4-437.4)   | 107.5±88.3           | 71.2(13.8-482.1)  | 0.6561        |
| VITAMIN_C       | 0.51±0.42                              | 0.41(0.14-2.6)     | 0.44±0.28            | 0.40(0.05-3.74)   | 0.6053        |
| VITAMIN_D3      | 0.96±0.29                              | 0.93(0.40-1.42)    | 0.91±0.26            | 0.88(0.32-1.78)   | 0.3611        |
| VITAMIN_K1      | 3.14±2.7                               | 2.3(0.22-13.9)     | 1.42±0.99            | 1.22(0.05-7.32)   | 0.0001        |
| VITAMIN_K2      | 1.07±1.9                               | 0.32(0.10-11.2)    | 0.66±1.09            | 0.28(0.082-11.0)  | 0.1134        |
| FOLATE          | 12.4±4.5                               | 12.6(2.8-19.6)     | 13.8±3.9             | 14.1(2.9-19.9)    | 0.0839        |
| VITAMIN D 25 OH | 33.9±13.6                              | 30.7(15.4-71.2)    | 48.6±23.2            | 41.8(8.8-136)     | 0.0001        |



|            |            |                    |            |                    |        |
|------------|------------|--------------------|------------|--------------------|--------|
| ISOLEUCINE | 84.0±27.5  | 84.2(35.7-142.7)   | 67.1±19.1  | 64.6(24.0-139.7)   | 0.0002 |
| VALINE     | 275.0±63.3 | 281.1(175.3-442.4) | 241.7±52.8 | 233.6(134.9-442.1) | 0.0020 |
| LEUCINE    | 179.9±36.8 | 182.7(113.7-233.5) | 161.7±34.1 | 157.4(79.7-249.2)  | 0.0033 |
| CITRULLINE | 29.3±7.5   | 30.8(10.3-41.7)    | 30.0±8.1   | 28.8(10.1-69.3)    | 0.8478 |
| ARGININE   | 134.4±38.1 | 125.0(76.9-211.3)  | 121.6±32.8 | 117.7(49.6-299.2)  | 0.0539 |

517

518

519

520

Table S5: Association of serum Apo A1 with micronutrients

|                 | Less than Reference<br>Range (n=47) |                    | Within range (n=323) |                   | P<br>(P<0.05) |
|-----------------|-------------------------------------|--------------------|----------------------|-------------------|---------------|
| ASPARAGINE      | 51.0±10.6                           | 49.4(34.1-79.1)    | 54.5±12.1            | 53.3(28.1-113.0)  | 0.0444        |
| GLUTAMINE       | 498.7±78.4                          | 490.2(320.3-719.9) | 506.4±81.7           | 509(202.2-752.4)  | 0.2889        |
| SERINE          | 147.0±34.8                          | 150.5(76.0-225.4)  | 148.8±34.6           | 144.1(59.6-282.9) | 0.8934        |
| CYSTEINE        | 20.7±8.7                            | 20.2(6.7-42.7)     | 17.7±9.2             | 16.4(2.2-60.3)    | 0.0210        |
| SELENIUM        | 140.6±34.4                          | 131.5(96.8-298.7)  | 143.7±28.4           | 141.7(93.4-360.4) | 0.1749        |
| VITAMIN E       | 12.2±4.8                            | 10.9(4.0-23.4)     | 13.5±4.7             | 12.4(5.6-30.7)    | 0.0369        |
| CHOLINE         | 13.7±5.8                            | 13.2(6.0-36.6)     | 14.1±5.6             | 12.7(1.0-39.6)    | 0.5099        |
| CARNITINE       | 26.3±6.5                            | 25.2(12.8-40.3)    | 27.1±7.3             | 27.2(4.1-50.5)    | 0.4189        |
| SODIUM          | 140.8±2.9                           | 141(134-148)       | 141.6±3.5            | 141(129-155.0)    | 0.1868        |
| POTASSIUM       | 4.4±0.4                             | 4.4(3.1-5.3)       | 4.5±0.3              | 4.5(3.6-6.22)     | 0.0501        |
| CALCIUM         | 9.4±0.3                             | 9.5(8.7-10.4)      | 9.6±0.39             | 9.6(8.5-11.1)     | 0.0022        |
| MANGANESE       | 0.70±0.39                           | 0.64(0.2-2.6)      | 0.7±0.4              | 0.64(0.24-6.8)    | 0.2491        |
| ZINC            | 0.69±0.19                           | 0.64(0.45-1.50)    | 0.71±0.15            | 0.69(0.39-2.23)   | 0.0315        |
| COPPER          | 1.0±0.29                            | 1.10(0.48-1.59)    | 1.05±0.30            | 0.99(0.37-3.41)   | 0.5663        |
| CHROMIUM        | 0.23±0.11                           | 0.22(0.04-0.56)    | 0.2±0.16             | 0.22(0.01-1.79)   | 0.4849        |
| IRON            | 85.6±36.6                           | 78.5(25.3-182.4)   | 105.5±38.4           | 101.6(33.2-238.9) | 0.0015        |
| MAGNESIUM       | 2.1±0.22                            | 2.16(1.2-2.5)      | 2.2±0.18             | 2.2(1.03-2.95)    | 0.0638        |
| VITAMIN A       | 72.0±23.2                           | 65.0(38.2-145.8)   | 78.3±24.4            | 73.5(34.1-151.9)  | 0.0573        |
| VITAMIN_B1      | 20.5±14.3                           | 16.8(.89-66.4)     | 21.7±15.1            | 18.5(0.83-136.8)  | 0.4571        |
| VITAMIN_B2      | 24.0±18.8                           | 17.3(5.3-84.3)     | 28.0±22.8            | 21.9(4.8-174.1)   | 0.1599        |
| VITAMIN_B3      | 19.3±5.4                            | 19.8(5.4-30.3)     | 19.1±8.8             | 18.3(2.7-110.4)   | 0.5138        |
| VITAMIN_B6      | 20.2±34.8                           | 12.3(2.9-236.7)    | 16.6±13.9            | 12.4(1.1-84.2)    | 0.9154        |
| VITAMIN_B12     | 637.5±271.7                         | 559.4(245.1-1600)  | 750.3±330.1          | 691.3(196-1958)   | 0.0198        |
| VITAMIN_B5      | 104.0±81.5                          | 73.7(20.2-330.0)   | 107.2±87.9           | 70.0(13.8-482.1)  | 0.9560        |
| VITAMIN_C       | 0.41±0.24                           | 0.32(0.086-1.04)   | 0.45±0.31            | 0.41(0.05-3.74)   | 0.2341        |
| VITAMIN_D3      | 0.84±0.24                           | 0.81(0.41-1.5)     | 0.94±0.28            | 0.91(0.32-2.19)   | 0.0198        |
| VITAMIN_K1      | 1.3±1.1                             | 0.99(0.15-5.8)     | 1.6±1.3              | 1.2(0.05-13.9)    | 0.1330        |
| VITAMIN_K2      | 0.69±0.72                           | 0.34(0.10-3.24)    | 0.72±1.2             | 0.28(0.082-11.2)  | 0.1358        |
| FOLATE          | 12.1±4.0                            | 12.2(2.2-19.6)     | 13.8±4.0             | 14.2(2.8-19.9)    | 0.0050        |
| VITAMIN D 25 OH | 44.1±29.5                           | 31.4(8.8-136)      | 48.1±21.9            | 41.8(10.4-133)    | 0.0177        |

|            |            |                    |            |                    |        |
|------------|------------|--------------------|------------|--------------------|--------|
| ISOLEUCINE | 73.7±23.9  | 72.2(35.7-142.7)   | 68.1±20.0  | 65.3(24.0-139.7)   | 0.1804 |
| VALINE     | 251.1±63.6 | 238.2(149.8-442.4) | 244.6±53.8 | 236.9(134.9-442.1) | 0.6595 |
| LEUCINE    | 162.7±32.0 | 161.9(102-233.4)   | 163.4±35.1 | 158.8(79.7-249.2)  | 0.9295 |
| CITRULLINE | 28.2±8.1   | 27.8(10.3-47.9)    | 30.4±8.4   | 29.4(10.1-79.4)    | 0.1294 |
| ARGININE   | 122.2±26.7 | 115.8(78.3-205.3)  | 123.5±34.3 | 120(49.6-299.2)    | 0.8107 |

521

522

523

524

Table S6: Association of serum Apo B with micronutrients

|                 | Greater than Reference<br>Range (n=87) |                    | Within range (n=270) |                    | P<br>(P<0.05) |
|-----------------|----------------------------------------|--------------------|----------------------|--------------------|---------------|
| ASPARAGINE      | 53.4±11.1                              | 53.5(34.1-79.1)    | 54.2±12.3            | 52.8(28.1-113.0)   | 0.7013        |
| GLUTAMINE       | 489.6±84.4                             | 492.2(204.1-752.4) | 510.5±79.7           | 507.8(202.2-741.0) | 0.0643        |
| SERINE          | 140.6±33.0                             | 135.4(75.0-209.7)  | 151.1±34.7           | 147.2(59.6-282.9)  | 0.0189        |
| CYSTEINE        | 18.4±9.5                               | 17.9(2.8-60.3)     | 18.0±9.1             | 16.5(2.2-45.2)     | 0.6201        |
| SELENIUM        | 146.4±24.0                             | 144.8(93.4-210.8)  | 142.3±30.3           | 139(95.7-360.4)    | 0.0451        |
| VITAMIN E       | 16.0±5.5                               | 15.3(7.3-29.0)     | 12.5±4.1             | 11.7(4.0-30.7)     | 0.0001        |
| CHOLINE         | 14.4±5.3                               | 13.2(6.6-39.6)     | 13.9±5.7             | 12.4(1.0-36.6)     | 0.3090        |
| CARNITINE       | 27.8±7.7                               | 28.2(9.8-44.3)     | 26.7±7.1             | 26.6(4.1-50.5)     | 0.1555        |
| SODIUM          | 141.5±3.4                              | 141(133-151)       | 141.5±3.4            | 141(129-155)       | 0.8920        |
| POTASSIUM       | 4.5±0.35                               | 4.5(3.6-5.6)       | 4.5±0.40             | 4.49(3.1-6.22)     | 0.0377        |
| CALCIUM         | 9.7±0.3                                | 9.7(8.7-10.6)      | 9.6±0.3              | 9.6(8.5-11.1)      | 0.0055        |
| MANGANESE       | 0.73±0.29                              | 0.67(0.34-2.1)     | 0.73±0.49            | 0.63(0.24-6.82)    | 0.1635        |
| ZINC            | 0.73±0.11                              | 0.72(0.39-1.0)     | 0.70±0.17            | 0.68(0.44-2.23)    | 0.0058        |
| COPPER          | 1.0±0.32                               | 1.0(0.6-2.5)       | 1.0±0.3              | 1.0(0.3-3.4)       | 0.4660        |
| CHROMIUM        | 0.24±0.11                              | 0.22(0.05-0.59)    | 0.25±0.17            | 0.22(0.011-1.7)    | 0.9988        |
| IRON            | 109.3±34.2                             | 107.7(45.6-201.3)  | 100.8±39.9           | 97.7(25.3-238.9)   | 0.0239        |
| MAGNESIUM       | 2.2±0.1                                | 2.2(1.9-2.9)       | 2.1±0.19             | 2.1(1.0-2.6)       | 0.0002        |
| VITAMIN A       | 82.4±23.7                              | 77.7(34.1-145.8)   | 75.8±24.2            | 72.1(37.1-151.9)   | 0.0096        |
| VITAMIN_B1      | 19.3±14.1                              | 16.8(1.17-70.3)    | 22.2±15.2            | 18.6(0.83-136.8)   | 0.0516        |
| VITAMIN_B2      | 27.1±23.8                              | 20.9(6.2-174.1)    | 28.5±24.8            | 21.2(4.8-222.5)    | 0.7427        |
| VITAMIN_B3      | 18.7±11.9                              | 17.8(3.4-110.1)    | 19.3±7.0             | 19.1(2.7-40.6)     | 0.0954        |
| VITAMIN_B6      | 15.5±14.3                              | 11.7(2.9-84.2)     | 17.6±19.1            | 12.5(1.1-236.7)    | 0.2511        |
| VITAMIN_B12     | 750.2±345.3                            | 659.5(290.2-1958)  | 730.6±318.6          | 666.8(196-1923)    | 0.8363        |
| VITAMIN_B5      | 110.1±89.9                             | 72.0(13.8-437.4)   | 96.5±76.8            | 68.6(23.5-482.1)   | 0.4485        |
| VITAMIN_C       | 0.45±0.29                              | 0.40(0.05-3.74)    | 0.45±0.32            | 0.39(0.05-2.6)     | 0.7818        |
| VITAMIN_D3      | 0.87±0.24                              | 0.83(0.32-1.6)     | 1.09±0.30            | 1.08(0.44-2.19)    | 0.0001        |
| VITAMIN_K1      | 1.5±1.3                                | 1.2(0.05-13.9)     | 1.8±1.4              | 1.4(0.10-7.3)      | 0.0416        |
| VITAMIN_K2      | 0.6±1.0                                | 0.29(0.082-11.0)   | 0.86±1.6             | 0.28(0.10-11.2)    | 0.9964        |
| FOLATE          | 13.0±4.3                               | 13.3(2.8-19.8)     | 13.8±3.9             | 14.2(2.2-19.9)     | 0.1956        |
| VITAMIN D 25 OH | 47.6±22.3                              | 41.7(8.8-136)      | 47.5±25.3            | 40.1(15.4-133)     | 0.4508        |

|            |            |                    |            |                   |        |
|------------|------------|--------------------|------------|-------------------|--------|
| ISOLEUCINE | 72.7±19.9  | 70.7(34.0-121.4)   | 67.6±20.7  | 64.2(24.0-142.7)  | 0.0138 |
| VALINE     | 261.9±55.2 | 262.7(146.5-404.0) | 240.2±54.2 | 232.1(134.9)      | 0.0004 |
| LEUCINE    | 172±34.8   | 168.8(113.7-248.2) | 160.5±34.2 | 157.4(79.7-249.2) | 0.0138 |
| CITRULLINE | 30.1±8.0   | 28.8(10.1-69.3)    | 30.2±9.6   | 29.7(10.3-79.4)   | 0.9509 |
| ARGININE   | 123.7±33.8 | 119.4(49.6-299.2)  | 122.2±32.0 | 117.5(61.1-211.3) | 0.7427 |

525

526

527

528

Table S7: Association of serum Lipoprotein (a) with micronutrients

|                 | Greater than Reference<br>Range (n=87) |                    | Within range (n=270) |                    | P<br>(P<0.05) |
|-----------------|----------------------------------------|--------------------|----------------------|--------------------|---------------|
| ASPARAGINE      | 54.0±10.0                              | 54.2(31.1-80.6)    | 53.5±12.3            | 52.7(28.1-108.0)   | 0.4975        |
| GLUTAMINE       | 508.3±81.7                             | 514.8(320.3-710.3) | 505.3±80.5           | 506.9(202.2-741.0) | 0.8216        |
| SERINE          | 151.4±35.3                             | 150.7(59.6-274.5)  | 148.0±37.8           | 142.5(70.5-241.1)  | 0.4179        |
| CYSTEINE        | 17.9±8.6                               | 7.02(2.8-45.1)     | 19.0±9.9             | 17.4(3.3-45.2)     | 0.6336        |
| SELENIUM        | 139.2±21.9                             | 138.3(96.6-210.8)  | 141.5±25.9           | 138.0(93.4-274.7)  | 0.7976        |
| VITAMIN E       | 13.5±4.8                               | 12.0(5.6-29.4)     | 13.1±4.2             | 12.4(5.3-28.2)     | 0.9456        |
| CHOLINE         | 13.6±5.6                               | 11.9(5.8-36.6)     | 14.6±6.1             | 13.2(1.0-39.6)     | 0.1288        |
| CARNITINE       | 26.5±7.1                               | 26.7(12.5-50.5)    | 26.8±7.7             | 27.0(4.1-44.3)     | 0.7048        |
| SODIUM          | 141.5±3.5                              | 142(129-150)       | 141.6±3.6            | 141(133-155)       | 0.7881        |
| POTASSIUM       | 4.5±0.4                                | 4.5(3.1-5.6)       | 4.5±0.39             | 4.4(3.7-6.2)       | 0.4339        |
| CALCIUM         | 9.6±0.4                                | 9.5(8.7-10.6)      | 9.6±0.4              | 9.6(8.5-10.8)      | 0.6777        |
| MANGANESE       | 0.70±0.29                              | 0.64(0.24-1.85)    | 0.74±0.32            | 0.69(0.3-2.6)      | 0.2023        |
| ZINC            | 0.72±0.15                              | 0.69(0.45-1.5)     | 0.7±0.14             | 0.69(0.3-1.3)      | 0.4235        |
| COPPER          | 1.0±0.29                               | 1.0(0.10-2.1)      | 1.0±0.29             | 1.0(0.5-2.5)       | 0.4000        |
| CHROMIUM        | 0.24±0.12                              | 0.23(0.02-0.68)    | 0.25±0.14            | 0.22(0.02-1.0)     | 0.8911        |
| IRON            | 100.8±38.4                             | 95(33.7-238.9)     | 105.7±38.4           | 102.0(25.3-201.3)  | 0.3270        |
| MAGNESIUM       | 2.1±0.9                                | 2.1(1.2-2.6)       | 2.1±0.2              | 2.1(1.0-2.6)       | 0.4372        |
| VITAMIN A       | 76.8±25.4                              | 71.2(34.3-151.2)   | 77.9±25.9            | 71.5(36.9-151.5)   | 0.7935        |
| VITAMIN_B1      | 16.8±11.1                              | 14.9(1.0-49.2)     | 22.7±13.7            | 20.7(0.8-78.8)     | 0.0008        |
| VITAMIN_B2      | 26.7±20.4                              | 20.3(5.7-135.7)    | 30.1±30.4            | 22.2(5.7-222.5)    | 0.4808        |
| VITAMIN_B3      | 19.9±6.9                               | 19.8(3.4-35.4)     | 19.7±10.2            | 18.9(2.7-110.1)    | 0.3823        |
| VITAMIN_B6      | 17.2±22                                | 11.9(1.6-236.7)    | 17.1±16.9            | 11.0(1.4-84.2)     | 0.6969        |
| VITAMIN_B12     | 684.3±264.5                            | 599.1(196-1381)    | 776.9±364.0          | 713.1(200-1923)    | 0.1376        |
| VITAMIN_B5      | 103.8±81.9                             | 68.6(13.8-360.9)   | 101.8±86.0           | 70.0(21.5-482.1)   | 0.8976        |
| VITAMIN_C       | 0.43±0.24                              | 0.38(0.08-1.2)     | 0.44±0.33            | 0.4(0.05-3.7)      | 0.8100        |
| VITAMIN_D3      | 0.93±0.28                              | 0.91(0.3-1.7)      | 0.94±0.26            | 0.94(0.32-1.6)     | 0.4137        |
| VITAMIN_K1      | 1.5±1.1                                | 1.2(0.05-5.8)      | 1.5±1.1              | 1.32(0.1-7.3)      | 0.5896        |
| VITAMIN_K2      | 0.69±1.2                               | 0.29(0.08-11.2)    | 0.61±0.78            | 0.28(0.10-4.8)     | 0.9556        |
| FOLATE          | 13.5±4.2                               | 13.7(2.9-19.9)     | 13.8±3.7             | 13.9(3.4-19.8)     | 0.7113        |
| VITAMIN D 25 OH | 46.7±21.1                              | 40.9(10.4-128)     | 47.7±23.4            | 41.2(12.4-133)     | 0.9703        |

|            |            |                    |            |                    |        |
|------------|------------|--------------------|------------|--------------------|--------|
| ISOLEUCINE | 68.8±19.7  | 66.3(33.5-129.7)   | 68.6±21.6  | 65.6(24.0-142.7)   | 0.8235 |
| VALINE     | 243.9±56.8 | 236.2(149.8-442.7) | 243.1±53.4 | 240.0(146.5-409.1) | 0.9007 |
| LEUCINE    | 164.4±33.4 | 164.5(90.3-235.1)  | 161.1±33.9 | 157.2(80.3-248.2)  | 0.3296 |
| CITRULLINE | 29.6±7.8   | 28.6(10.1-51.2)    | 30.1±9.2   | 29.6(10.3-69.3)    | 0.5236 |
| ARGININE   | 124.7±39.2 | 118.3(56.1-299.2)  | 125.4±32.8 | 122.4(49.6-220.6)  | 0.5700 |

529

530

531

532

Table S8: Pearson correlation between serum cholesterol and micronutrients

|                 | r        | p       |
|-----------------|----------|---------|
| ASPARAGINE      | -0.125   | 0.018   |
| GLUTAMINE       | -0.1127  | 0.0331  |
| SERINE          | -0.02601 | 0.6238  |
| CYSTEINE        | -0.01392 | 0.793   |
| SELENIUM        | 0.02659  | 0.616   |
| VITAMIN E       | 0.4086   | <0.0001 |
| CHOLINE         | 0.03297  | 0.5341  |
| CARNITINE       | 0.09912  | 0.061   |
| SODIUM          | 0.01349  | 0.7992  |
| POTASSIUM       | 0.009154 | 0.863   |
| CALCIUM         | 0.01211  | 0.8193  |
| MANGANESE       | -0.08336 | 0.1154  |
| ZINC            | -0.06639 | 0.2101  |
| COPPER          | -0.05695 | 0.2826  |
| CHROMIUM        | -0.07196 | 0.1743  |
| IRON            | 0.1067   | 0.0437  |
| MAGNESIUM       | 0.01114  | 0.8337  |
| VITAMIN A       | 0.1471   | 0.0053  |
| VITAMIN B1      | -0.08282 | 0.1178  |
| VITAMIN B2      | -0.02302 | 0.6643  |
| VITAMIN B3      | -0.03355 | 0.5268  |
| VITAMIN B6      | -0.08714 | 0.0997  |
| VITAMIN B12     | 0.03583  | 0.4992  |
| VITAMIN B5      | -0.0739  | 0.1629  |
| VITAMIN C       | -0.02218 | 0.6757  |
| VITAMIN D3      | 0.5125   | <0.0001 |
| VITAMIN K1      | 0.2334   | <0.0001 |
| VITAMIN K2      | 0.07045  | 0.1835  |
| FOLATE          | -0.104   | 0.0493  |
| VITAMIN D 25 OH | 0.06205  | 0.2416  |
| ISOLEUCINE      | 0.007779 | 0.8834  |
| VALINE          | 0.09774  | 0.0647  |
| LEUCINE         | 0.04598  | 0.3857  |
| CITRULLINE      | 0.02438  | 0.6458  |
| ARGININE        | 0.02322  | 0.6614  |

533  
534  
535  
536  
537  
538  
539  
540

Table S9: Pearson correlation between serum LDL and micronutrients

|                 | r        | p       |
|-----------------|----------|---------|
| ASPARAGINE      | -0.1217  | 0.0213  |
| GLUTAMINE       | -0.1074  | 0.0423  |
| SERINE          | -0.04485 | 0.3975  |
| CYSTEINE        | 0.0241   | 0.6495  |
| SELENIUM        | -0.00553 | 0.917   |
| VITAMIN E       | 0.3398   | <0.0001 |
| CHOLINE         | -0.00725 | 0.8912  |
| CARNITINE       | 0.1446   | 0.0061  |
| SODIUM          | 0.02695  | 0.6113  |
| POTASSIUM       | 0.02737  | 0.6058  |
| CALCIUM         | 0.03125  | 0.5556  |
| MANGANESE       | -0.09346 | 0.0774  |
| ZINC            | -0.07538 | 0.1546  |
| COPPER          | -0.07262 | 0.1704  |
| CHROMIUM        | -0.08254 | 0.119   |
| IRON            | 0.1199   | 0.0233  |
| MAGNESIUM       | 0.03085  | 0.5607  |
| VITAMIN A       | 0.09463  | 0.0737  |
| VITAMIN_B1      | -0.07151 | 0.177   |
| VITAMIN_B2      | -0.02853 | 0.5906  |
| VITAMIN_B3      | -0.00581 | 0.9127  |
| VITAMIN_B6      | -0.05988 | 0.2585  |
| VITAMIN_B12     | 0.03573  | 0.5003  |
| VITAMIN_B5      | -0.04077 | 0.4419  |
| VITAMIN_C       | 0.00019  | 0.9971  |
| VITAMIN_D3      | 0.4774   | <0.0001 |
| VITAMIN_K1      | 0.06084  | 0.2509  |
| VITAMIN_K2      | 0.0651   | 0.2192  |
| FOLATE          | -0.07946 | 0.1335  |
| VITAMIN_D_25_OH | 0.07967  | 0.1324  |
| ISOLEUCINE      | 0.01793  | 0.7354  |
| VALINE          | 0.1471   | 0.0053  |
| LEUCINE         | 0.09979  | 0.0593  |
| CITRULLINE      | 0.001029 | 0.9845  |

|          |          |        |
|----------|----------|--------|
| ARGININE | -0.03571 | 0.5007 |
|----------|----------|--------|

541

542

543

544

545

546

547

548

Table S10: Pearson correlation between serum HDL and micronutrients

|                 | r        | p       |
|-----------------|----------|---------|
| ASPARAGINE      | 0.007988 | 0.8803  |
| GLUTAMINE       | 0.01765  | 0.7392  |
| SERINE          | 0.06766  | 0.2016  |
| CYSTEINE        | -0.2289  | <0.0001 |
| SELENIUM        | 0.08967  | 0.0902  |
| VITAMIN E       | -0.099   | 0.0613  |
| CHOLINE         | 0.01779  | 0.7373  |
| CARNITINE       | -0.1653  | 0.0017  |
| SODIUM          | -0.08206 | 0.1212  |
| POTASSIUM       | -0.0799  | 0.1313  |
| CALCIUM         | -0.08061 | 0.1279  |
| MANGANESE       | 0.03657  | 0.4903  |
| ZINC            | 0.03521  | 0.5067  |
| COPPER          | 0.04878  | 0.3574  |
| CHROMIUM        | 0.0416   | 0.4326  |
| IRON            | 0.03515  | 0.5074  |
| MAGNESIUM       | -0.08087 | 0.1267  |
| VITAMIN A       | -0.03156 | 0.5517  |
| VITAMIN_B1      | 0.02135  | 0.6873  |
| VITAMIN_B2      | 0.02877  | 0.5874  |
| VITAMIN_B3      | 0.01155  | 0.8276  |
| VITAMIN_B6      | -0.01147 | 0.8288  |
| VITAMIN_B12     | 0.07736  | 0.1441  |
| VITAMIN_B5      | -0.01955 | 0.7123  |
| VITAMIN_C       | -0.01446 | 0.7852  |
| VITAMIN_D3      | 0.02496  | 0.6378  |
| VITAMIN_K1      | -0.04944 | 0.3509  |
| VITAMIN_K2      | -0.0078  | 0.8831  |
| FOLATE          | -0.02846 | 0.5915  |
| VITAMIN_D_25_OH | 0.0655   | 0.2163  |
| ISOLEUCINE      | -0.2298  | <0.0001 |
| VALINE          | -0.2317  | <0.0001 |
| LEUCINE         | -0.2405  | <0.0001 |

|            |          |        |
|------------|----------|--------|
| CITRULLINE | 0.0138   | 0.7948 |
| ARGININE   | -0.03223 | 0.5432 |

549

550

551

552

553

554

555

556

Table S11: Pearson correlation between serum triglycerides and micronutrients

|                 | r        | p       |
|-----------------|----------|---------|
| ASPARAGINE      | 0.001283 | 0.9807  |
| GLUTAMINE       | -0.1002  | 0.0582  |
| SERINE          | -0.09025 | 0.0882  |
| CYSTEINE        | 0.1626   | 0.002   |
| SELENIUM        | 0.001458 | 0.9781  |
| VITAMIN E       | 0.3832   | <0.0001 |
| CHOLINE         | 0.02606  | 0.6232  |
| CARNITINE       | 0.1316   | 0.0127  |
| SODIUM          | 0.03108  | 0.5578  |
| POTASSIUM       | 0.0221   | 0.6769  |
| CALCIUM         | 0.02466  | 0.6419  |
| MANGANESE       | -0.05805 | 0.2733  |
| ZINC            | -0.0603  | 0.2552  |
| COPPER          | -0.05772 | 0.2761  |
| CHROMIUM        | -0.06203 | 0.2417  |
| IRON            | -0.03861 | 0.4665  |
| MAGNESIUM       | 0.02212  | 0.6766  |
| VITAMIN A       | 0.2278   | <0.0001 |
| VITAMIN_B1      | -0.04035 | 0.4466  |
| VITAMIN_B2      | -0.05275 | 0.3196  |
| VITAMIN_B3      | -0.02601 | 0.6238  |
| VITAMIN_B6      | -0.1057  | 0.0457  |
| VITAMIN_B12     | -0.1209  | 0.0221  |
| VITAMIN_B5      | -0.0363  | 0.4936  |
| VITAMIN_C       | -0.02185 | 0.6803  |
| VITAMIN_D3      | 0.1342   | 0.011   |
| VITAMIN_K1      | 0.5732   | <0.0001 |
| VITAMIN_K2      | 0.0625   | 0.2382  |
| FOLATE          | -0.01247 | 0.8141  |
| VITAMIN_D_25_OH | -0.1507  | 0.0043  |
| ISOLEUCINE      | 0.2838   | <0.0001 |
| VALINE          | 0.2234   | <0.0001 |

|            |         |         |
|------------|---------|---------|
| LEUCINE    | 0.2139  | <0.0001 |
| CITRULLINE | -0.0145 | 0.7845  |
| ARGININE   | 0.1363  | 0.0098  |

557

558

559

560

561

562

563

564

Table S12: Pearson correlation between serum Apo A and micronutrients

|                 | r        | p      |
|-----------------|----------|--------|
| ASPARAGINE      | -0.04291 | 0.419  |
| GLUTAMINE       | 0.003761 | 0.9435 |
| SERINE          | 0.0321   | 0.5455 |
| CYSTEINE        | -0.05867 | 0.2689 |
| SELENIUM        | 0.0395   | 0.4569 |
| VITAMIN E       | -0.05202 | 0.327  |
| CHOLINE         | -0.03578 | 0.5004 |
| CARNITINE       | -0.0026  | 0.9609 |
| SODIUM          | -0.06147 | 0.2467 |
| POTASSIUM       | -0.0526  | 0.3216 |
| CALCIUM         | -0.05579 | 0.2931 |
| MANGANESE       | 0.05431  | 0.3062 |
| ZINC            | 0.04085  | 0.4417 |
| COPPER          | 0.05533  | 0.2971 |
| CHROMIUM        | 0.05078  | 0.3387 |
| IRON            | 0.01219  | 0.8185 |
| MAGNESIUM       | -0.05607 | 0.2907 |
| VITAMIN A       | 0.03416  | 0.52   |
| VITAMIN_B1      | 0.009489 | 0.8582 |
| VITAMIN_B2      | -0.05013 | 0.345  |
| VITAMIN_B3      | -0.04226 | 0.426  |
| VITAMIN_B6      | -0.05052 | 0.3412 |
| VITAMIN_B12     | 0.03913  | 0.4611 |
| VITAMIN_B5      | -0.05052 | 0.3412 |
| VITAMIN_C       | -0.00363 | 0.9455 |
| VITAMIN_D3      | -0.05824 | 0.2724 |
| VITAMIN_K1      | -0.04603 | 0.3859 |
| VITAMIN_K2      | -0.04088 | 0.4413 |
| FOLATE          | 0.07275  | 0.1702 |
| VITAMIN_D_25_OH | -0.07913 | 0.1356 |
| ISOLEUCINE      | -0.04946 | 0.3514 |



|            |          |        |
|------------|----------|--------|
| VALINE     | -0.02571 | 0.6283 |
| LEUCINE    | -0.06696 | 0.2069 |
| CITRULLINE | 0.002819 | 0.9577 |
| ARGININE   | 0.003076 | 0.9538 |

565

566

567

568

569

570

571

572

Table S13: Pearson correlation between serum Apo B and micronutrients

|                 | r        | p      |
|-----------------|----------|--------|
| ASPARAGINE      | -0.03841 | 0.4694 |
| GLUTAMINE       | -0.1388  | 0.0086 |
| SERINE          | -0.1269  | 0.0165 |
| CYSTEINE        | -0.02353 | 0.6577 |
| SELENIUM        | -0.01502 | 0.7774 |
| VITAMIN E       | 0.06915  | 0.1924 |
| CHOLINE         | 0.032    | 0.5467 |
| CARNITINE       | 0.03729  | 0.4825 |
| SODIUM          | 0.04303  | 0.4176 |
| POTASSIUM       | 0.03938  | 0.4582 |
| CALCIUM         | 0.03969  | 0.4547 |
| MANGANESE       | -0.00535 | 0.9198 |
| ZINC            | -0.00317 | 0.9525 |
| COPPER          | 0.01326  | 0.8028 |
| CHROMIUM        | -0.00639 | 0.9042 |
| IRON            | 0.08265  | 0.119  |
| MAGNESIUM       | 0.04038  | 0.4469 |
| VITAMIN A       | 0.1008   | 0.057  |
| VITAMIN_B1      | -0.02215 | 0.6767 |
| VITAMIN_B2      | -0.0354  | 0.505  |
| VITAMIN_B3      | -0.09294 | 0.0795 |
| VITAMIN_B6      | -0.02192 | 0.6798 |
| VITAMIN_B12     | 0.003217 | 0.9517 |
| VITAMIN_B5      | -0.00175 | 0.9737 |
| VITAMIN_C       | 0.01495  | 0.7784 |
| VITAMIN_D3      | 0.04051  | 0.4455 |
| VITAMIN_K1      | -0.00555 | 0.9167 |
| VITAMIN_K2      | -0.07411 | 0.1623 |
| FOLATE          | 0.1001   | 0.0589 |
| VITAMIN D 25 OH | -0.01943 | 0.7144 |

|            |          |        |
|------------|----------|--------|
| ISOLEUCINE | 0.09702  | 0.0671 |
| VALINE     | 0.1259   | 0.0173 |
| LEUCINE    | 0.03799  | 0.4743 |
| CITRULLINE | -0.06951 | 0.1901 |
| ARGININE   | -0.1126  | 0.0334 |

573

574

575

576

577

578

579

580

Table S14: Pearson correlation between serum lipoprotein A and micronutrients

|             | r        | p      |
|-------------|----------|--------|
| ASPARAGINE  | -0.01713 | 0.7914 |
| GLUTAMINE   | 0.06125  | 0.3437 |
| SERINE      | -0.07783 | 0.2287 |
| CYSTEINE    | 0.03708  | 0.5668 |
| SELENIUM    | 0.04334  | 0.5031 |
| VITAMIN E   | 0.008081 | 0.9007 |
| CHOLINE     | -0.06643 | 0.3044 |
| CARNITINE   | -0.05322 | 0.4108 |
| SODIUM      | -0.03759 | 0.5614 |
| POTASSIUM   | 0.09305  | 0.1498 |
| CALCIUM     | 0.000307 | 0.9962 |
| MANGANESE   | -0.01672 | 0.7963 |
| ZINC        | 0.03884  | 0.5485 |
| COPPER      | 0.04358  | 0.5007 |
| CHROMIUM    | -0.01997 | 0.7577 |
| IRON        | 0.07018  | 0.2778 |
| MAGNESIUM   | 0.01067  | 0.8691 |
| VITAMIN A   | 0.0261   | 0.6869 |
| VITAMIN_B1  | -0.1818  | 0.0046 |
| VITAMIN_B2  | 0.02598  | 0.6882 |
| VITAMIN_B3  | -0.01185 | 0.8548 |
| VITAMIN_B6  | -0.00366 | 0.955  |
| VITAMIN_B12 | -0.08534 | 0.1867 |
| VITAMIN_B5  | 0.01869  | 0.7729 |
| VITAMIN_C   | 0.08509  | 0.188  |
| VITAMIN_D3  | 0.05586  | 0.388  |
| VITAMIN_K1  | 0.004489 | 0.9447 |
| VITAMIN_K2  | -0.04037 | 0.5328 |
| FOLATE      | -0.03829 | 0.5541 |

|                 |          |        |
|-----------------|----------|--------|
| VITAMIN D 25 OH | 0.07921  | 0.2205 |
| ISOLEUCINE      | -0.02975 | 0.6458 |
| VALINE          | -0.0444  | 0.4927 |
| LEUCINE         | 0.02835  | 0.6614 |
| CITRULLINE      | -0.02425 | 0.708  |
| ARGININE        | -0.0665  | 0.3039 |

581

582

583

584

585

586

587

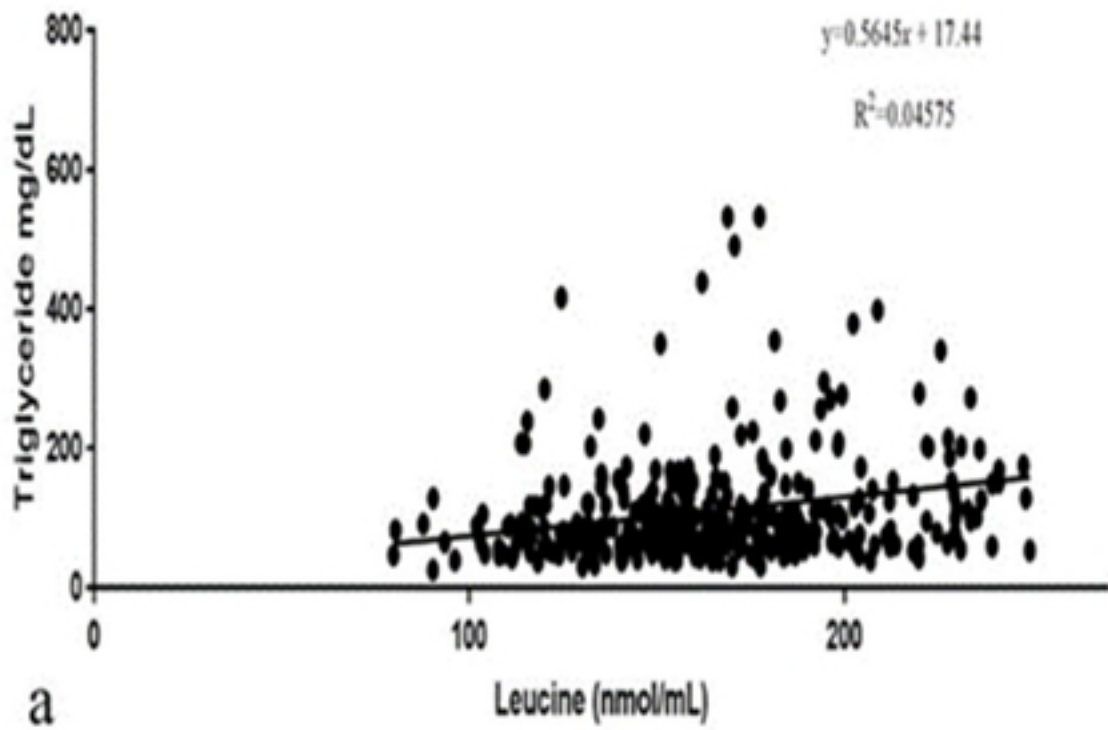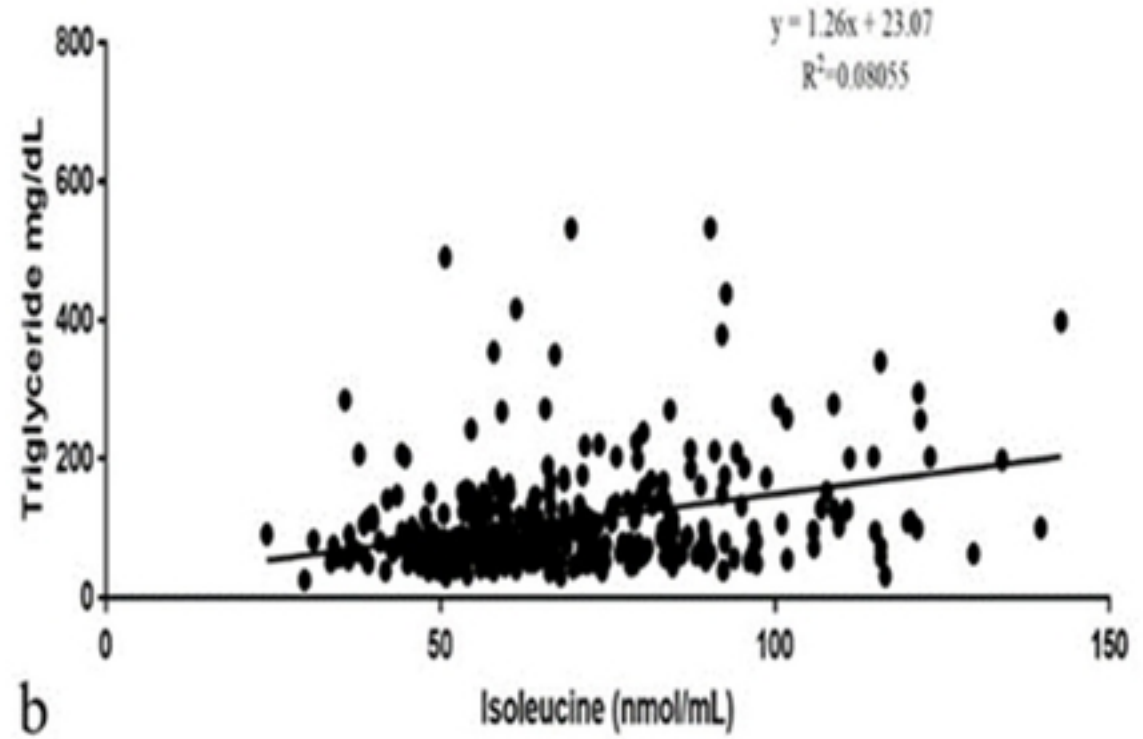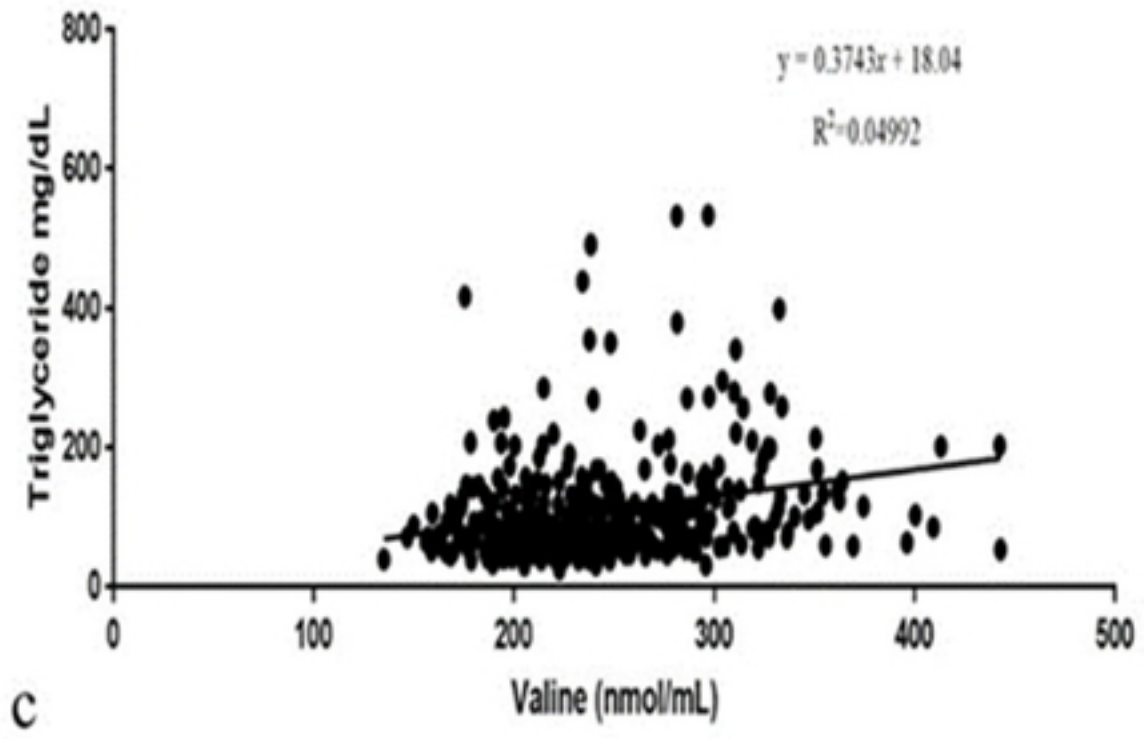

Figure

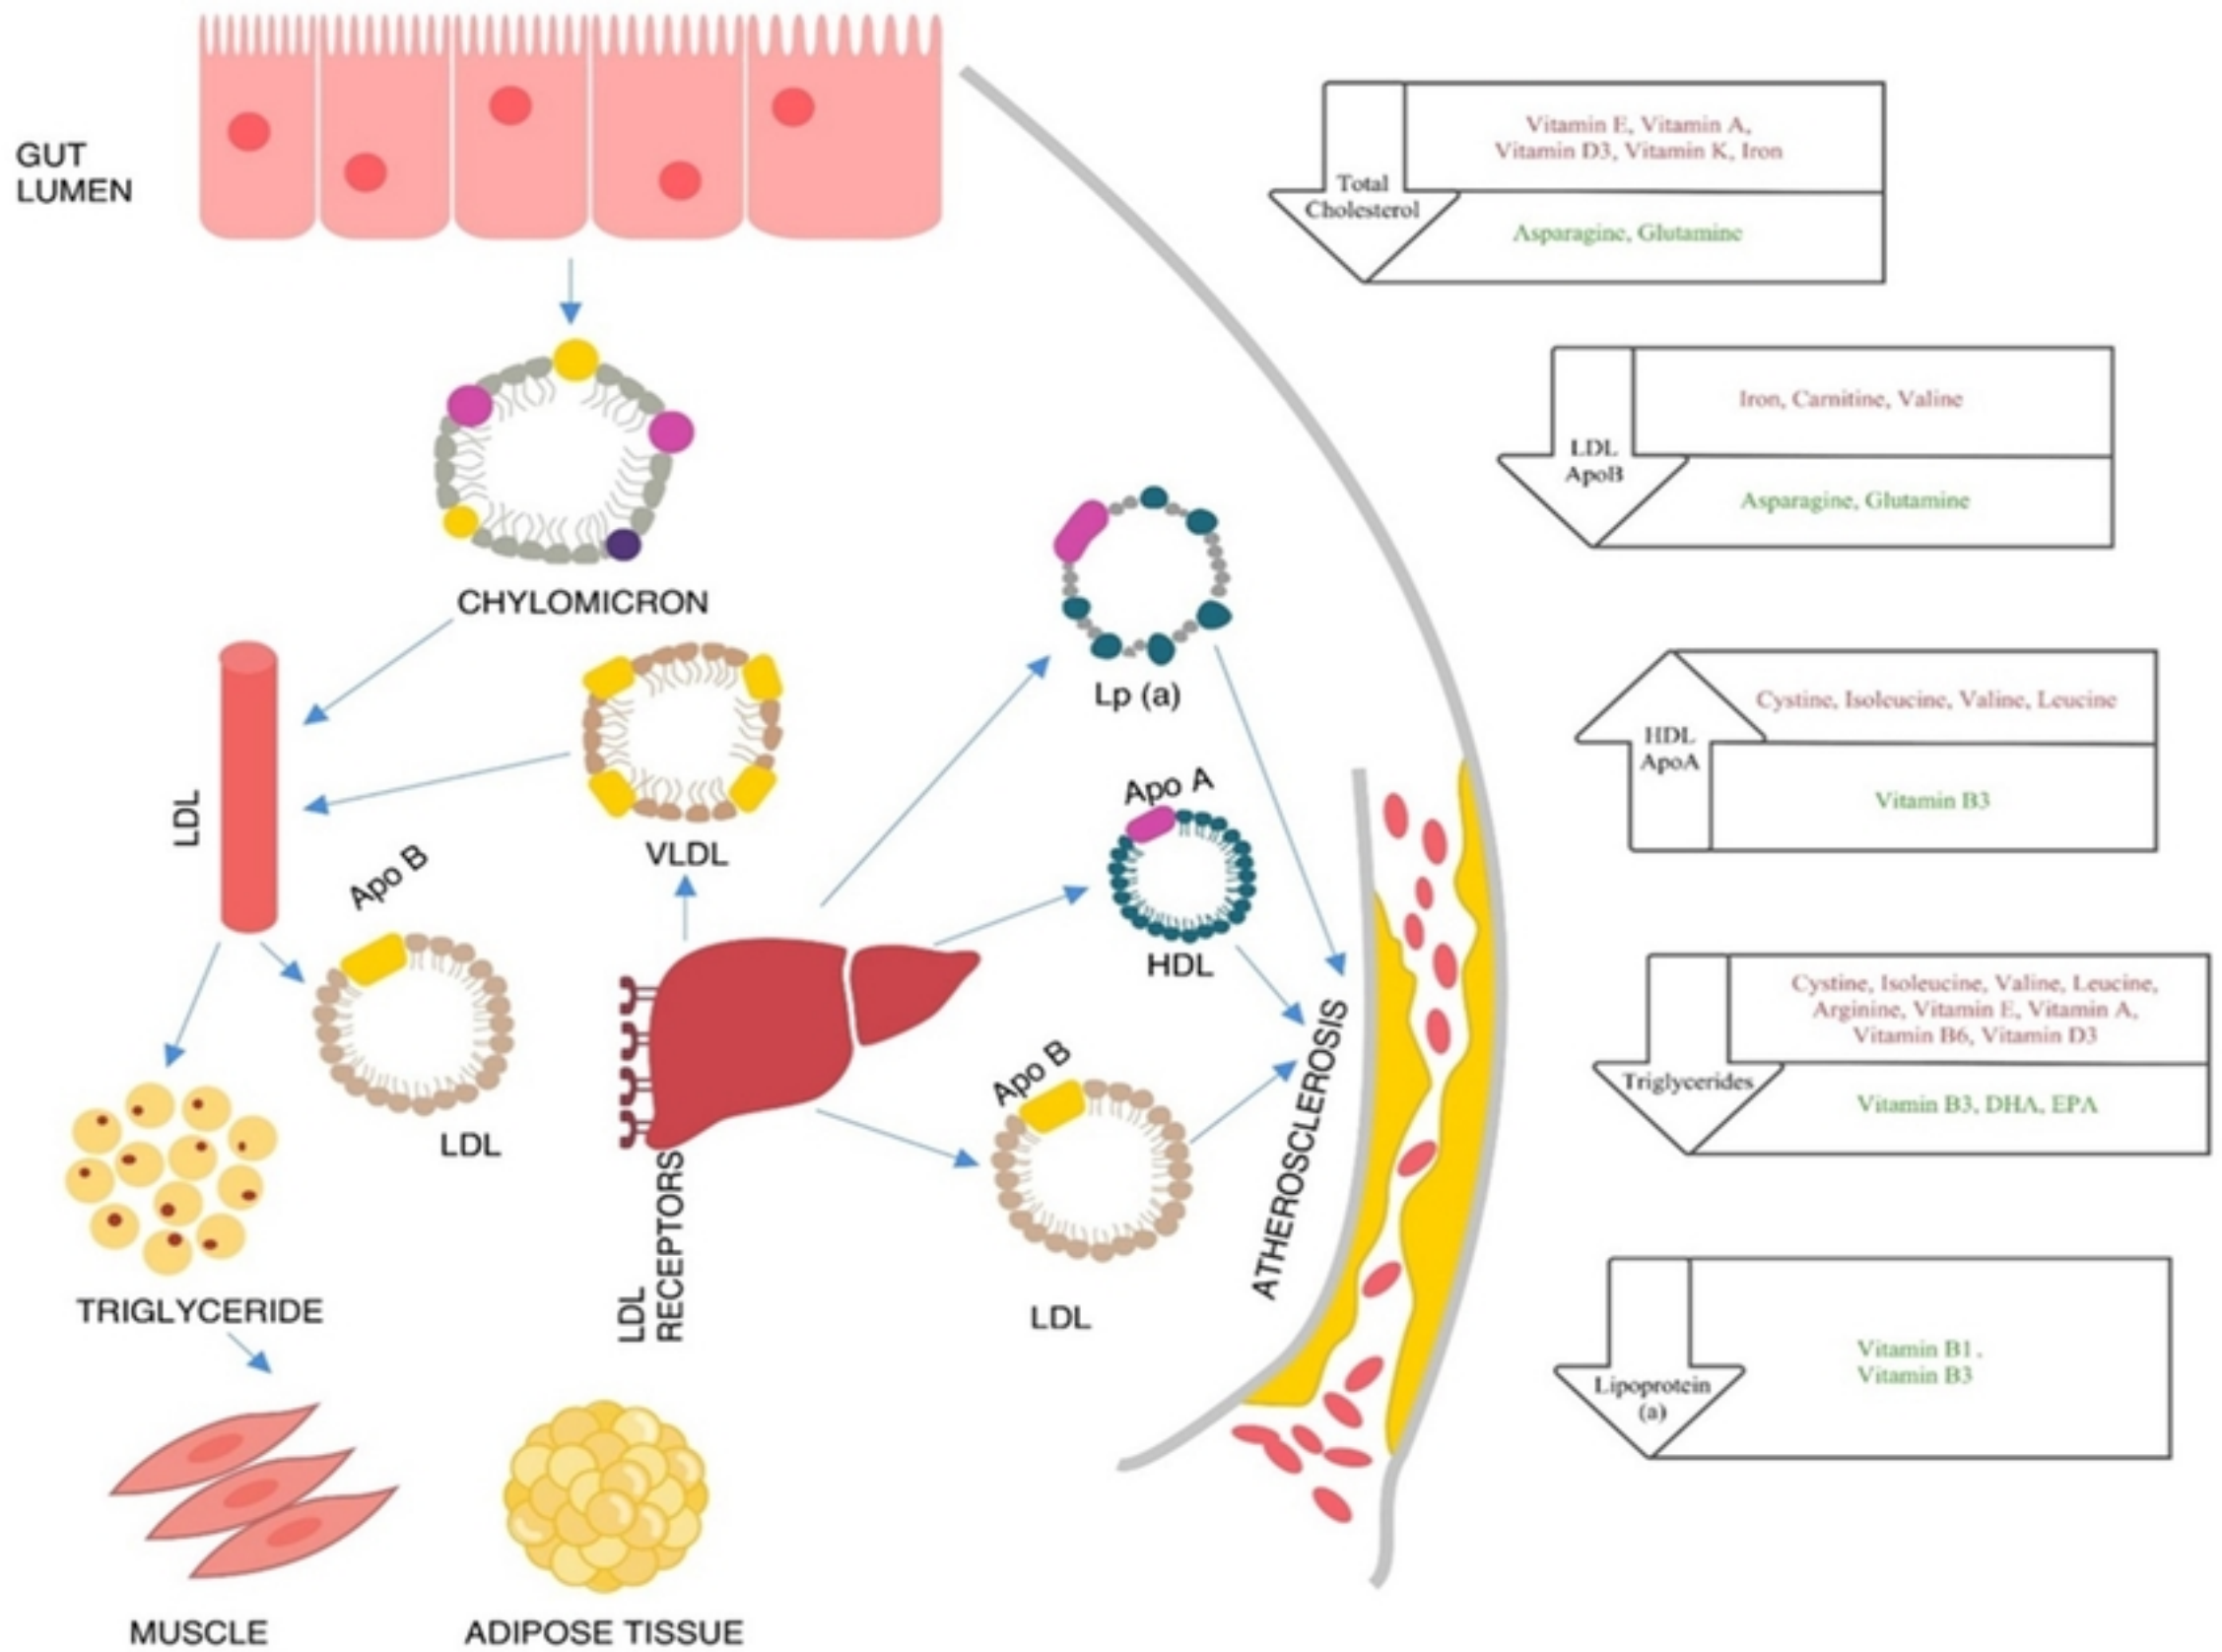

Figure
